# Fixation dynamics of beneficial alleles in prokaryotic polyploid chromosomes and plasmids

Mario Santer<sup>1</sup>, Anne Kupczok<sup>2,3</sup>, Tal Dagan<sup>2</sup>, and Hildegard Uecker<sup>1</sup>

<sup>1</sup>Research group Stochastic Evolutionary Dynamics, Department of Evolutionary Theory, Max Planck Institute for Evolutionary Biology, Plön, Germany

<sup>2</sup>Institute of General Microbiology, Kiel University, Kiel, Germany

<sup>3</sup>Bioinformatics group, Department of Plant Sciences, Wageningen University & Research, Wageningen, Netherlands

**Short title:** Fixation dynamics on multicopy replicons

**Keywords:**

polyploidy, plasmid copy number, prokaryote evolution, genetic variation, heterozygosity

**Corresponding author:**

Mario Santer  
Max Planck Institute for Evolutionary Biology  
August-Thienemann-Straße 2  
24306 Plön, Germany  
Email: [santer@evolbio.mpg.de](mailto:santer@evolbio.mpg.de)  
Phone: +49 4522 763 485

## Abstract

1  
2       Theoretical population genetics has been mostly developed for sexually repro-  
3       ducing diploid and for monoploid (haploid) organisms, focusing on eukaryotes. The  
4       evolution of bacteria and archaea is often studied by models for the allele dynamics  
5       in monoploid populations. However, many prokaryotic organisms harbor multicopy  
6       replicons – chromosomes and plasmids – and theory for the allele dynamics in popula-  
7       tions of polyploid prokaryotes remains lacking. Here we present a population genetics  
8       model for replicons with multiple copies in the cell. Using this model, we characterize  
9       the fixation process of a dominant beneficial mutation at two levels: the phenotype  
10       and the genotype. Our results show that, depending on the mode of replication and  
11       segregation, the fixation time of mutant phenotypes may precede the genotypic fixa-  
12       tion time by many generations; we term this time interval the heterozygosity window.  
13       We furthermore derive concise analytical expressions for the occurrence and length of  
14       the heterozygosity window, showing that it emerges if the copy number is high and  
15       selection strong. Replicon ploidy thus allows for the maintenance of genetic variation  
16       following phenotypic adaptation and consequently for reversibility in adaptation to  
17       fluctuating environmental conditions.

## 18 Introduction

19 Genetic variation is an important determinant of a population's capacity to adapt to novel  
20 environmental conditions. In monoploid organisms, genetic variation exists only at the level  
21 of the population, whereas polyploid organisms may also be genetically heterogeneous at the  
22 intracellular level. In diploid eukaryotic organisms, observed heterozygosity – the carriage of  
23 different alleles by the two copies of a chromosome within a cell – is an important measure  
24 of genetic variation. In contrast, the existence and importance of intracellular genetic  
25 variation in prokaryotes has been so far much less appreciated; nonetheless polyploidy is  
26 common in prokaryotic species (Soppa, 2021). Polyploid chromosomes have been described  
27 across a wide range of taxa including cyanobacteria (Griese et al., 2011; Watanabe, 2020),  
28 gammaproteobacteria (Ionescu et al., 2017), as well as halophilic and methanogenic archaea  
29 (Breuert et al., 2006; Hildenbrand et al., 2011; Soppa, 2017). The number of chromosome  
30 copies in prokaryotes ranges from a few to several hundreds, and may also depend on  
31 the growth phase and the nutrient conditions (e.g., Maldonado et al., 1994; Hildenbrand  
32 et al., 2011; Watanabe, 2020). In bacterial species that are monoploid during slow growth,  
33 the number of chromosomes may temporarily increase during exponential growth (Nielsen  
34 et al., 2007; Sun et al., 2018). Indeed, early studies of bacterial genetics already observed  
35 heterozygosity in seemingly monoploid bacterial species such as *Escherichia coli* (Morse  
36 et al., 1956), *Bacillus subtilis* (Iyer, 1965), or *Streptococcus pneumoniae* (Guerrini and Fox,  
37 1968). In addition to chromosomes, extrachromosomal genetic elements, such as bacterial  
38 plasmids, are often present in multiple copies in the cell. The plasmid copy number depends  
39 on the plasmid type and the environmental conditions, with some plasmid types reaching  
40 hundreds of plasmid copies in the cell (Friebs, 2004; Rodríguez-Beltrán et al., 2021).

41 In sexually reproducing eukaryotes, heterozygosity is typically generated at the forma-  
42 tion of zygotes. In prokaryotes, heterozygosity is generated through *de novo* mutations or

43 recombination with DNA acquired through lateral transfer, e.g., via transformation, conju-  
44 gation, or transduction. The subsequent maintenance of heterozygosity over time depends  
45 on the allele dynamics in the population. Two key determinants of allele dynamics in the  
46 population are the mode of replicon inheritance and the fitness effect of the mutant allele.  
47 Depending on the mode of replicon inheritance, daughter cells may be exact copies of the  
48 mother cell or differ in the distribution of alleles. In the latter case, segregation of the  
49 mutant allele may lead to the emergence of homozygous mutant cells. If the mutation is  
50 beneficial and survives stochastic loss while rare, the mutant allele will then ultimately fix  
51 in the population. Processes occurring at the intracellular level during cell division thus  
52 play an important role in the evolutionary dynamics of alleles in multicopy replicons and  
53 in their fixation processes and times.

54 The process of beneficial allele fixation plays a role in the rate of adaptation and the  
55 maintenance of variation. During the fixation process, both novel and wild-type alleles  
56 coexist in the population; once the beneficial allele has been fixed in the population, genetic  
57 variation at the allele locus is eliminated. Modelling allele fixation times has a long history  
58 in mathematical population genetics dating back to Kimura and Ohta (1969). Most existing  
59 models, however, focus on allele fixation in diploid sexually reproducing or in monoploid  
60 species. A recent modeling study on the evolutionary dynamics of alleles in multicopy  
61 plasmids suggests that the fixation times of alleles emerging in high-copy-number plasmids  
62 are longer than those of alleles emerging in low-copy number plasmids (Ilhan et al., 2019).  
63 Furthermore, Halleran et al. (2019) point out that random segregation of plasmid copies  
64 allows for allele fixation, while deterministic segregation hinders allele fixation. Both results  
65 clearly show that the allele dynamics on multicopy replicons are strongly influenced by the  
66 replicon properties. Yet, the effect of different replication and segregation modes on the  
67 fixation process, depending on the strength of selection, is still poorly understood.

68 Here we develop a mathematical framework to model the fixation process of beneficial al-

69 leles on multicopy replicons in asexual unicellular organisms. Our framework is germane  
70 to the evolutionary dynamics of alleles in polyploid prokaryotic chromosomes and in mul-  
71 ticopy plasmids. We apply a classical population genetic model – the time-continuous  
72 Moran model with selection – and include various modes of replication and segregation of  
73 multicopy replicons. With this model, we investigate the dynamics of dominant beneficial  
74 alleles in the population. In the analysis, we follow the frequencies of heterozygous and  
75 homozygous mutant cells throughout the fixation process. Allele fixation in our model is  
76 defined at the levels of the cell phenotype and genotype, and the fixation times at both  
77 levels are compared. Fixation of the mutant phenotype implies phenotypic adaptation of  
78 the population. We describe that – if the two fixation times do not coincide – genetic  
79 variation still persists during the time between fixation of the phenotype and fixation of  
80 the genotype.

## 81 **The Model**

82 We consider a population of bacteria (or other prokaryotes) with a constant number of  
83  $N$  cells, each carrying  $n$  copies of a replicon (e.g., a multicopy (polyploid) chromosome  
84 or plasmid). We assume that there are two genetic variants of the replicon, carrying the  
85 *wild-type* and the *mutant* alleles respectively. Consequently, for  $n > 1$ , cells might be either  
86 heterozygous (i.e., carrying both alleles) or homozygous (see Figure 1).

87 We assume that cells carrying at least one mutant replicon copy have a selective advantage  
88  $s > 0$ . The mutation is thus dominant. Initially at  $t = 0$ , the mutant type is present in  
89 a single replicon copy in a small fraction  $f$  of cells. The initial population composition,  
90 as defined here, may arise, for example, due to a transformation event in the laboratory  
91 (or plasmid invasion). Later, we also consider adaptation starting from a balance between  
92 recurrent transformation and purifying negative selection against mutant cells that has

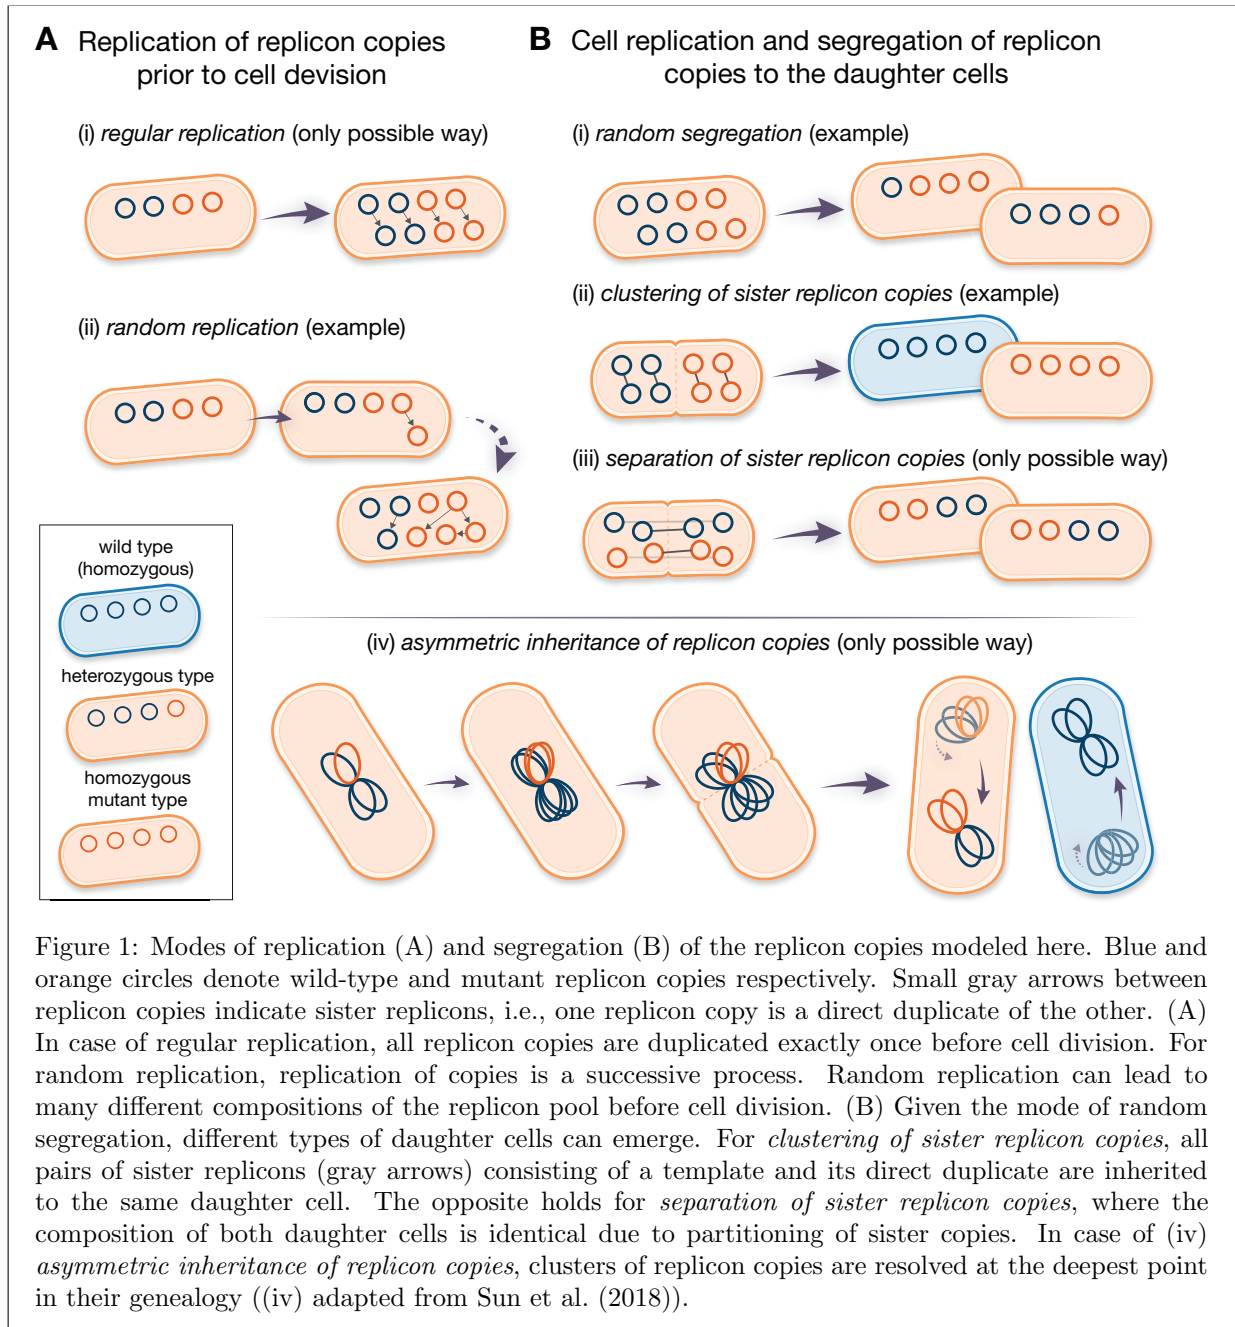

93 established in a different environment, in which the mutation is deleterious. We do not  
94 consider the emergence of *de novo* mutations during the fixation process.

95 To describe the allele dynamics, we apply a classical population genetics model, the Moran  
96 model in continuous time (Moran, 1958), extended for multicopy replicons (Santer and

97 Uecker, 2020). Mutant cells with  $i > 0$  mutant replicon copies divide at rate  $\lambda_i \equiv 1 + s$ ,  
98 while wild-type cells divide at rate  $\lambda_0 \equiv 1$ . A dividing cell (parental cell) gives rise to two  
99 daughter cells, which replace the parental cell and one additional, randomly chosen, cell  
100 in the population. The formation of  $n$  new replicon copies occurs in the model prior to  
101 cell division. Here, we consider two modes of replication: regular replication and random  
102 replication (Figure 1A, see also Novick and Hoppensteadt, 1978). In the regular replication  
103 mode, each replicon copy is duplicated prior to cell division. This is assumed for the  
104 replication of many chromosome types (Skarstad et al., 1986; Nordström and Dasgupta,  
105 2006). In the random replication mode, the following procedure is repeated  $n$  times: a  
106 single replicon copy is randomly selected for replication and the replicated copy is added to  
107 the replicon pool until the total number of replicon copies is  $2n$  in the cell. This mode better  
108 reflects the replication mechanism of plasmids (Rownd, 1969; Bogan et al., 2001; Nordström,  
109 2006). Possibly but not necessarily, it might also reflect the replication of some polyploid  
110 chromosomes as in some cyanobacteria, where only few chromosome copies are duplicated at  
111 once (Ohbayashi et al., 2019; Watanabe et al., 2012; Soppa, 2021). At cell division, the total  
112 replicon pool is divided equally between the daughter cells, i.e., each daughter cell receives  
113  $n$  copies. In our baseline model, we assume that the segregation of mutant and wild-type  
114 replicons to the daughter cells is random (Figure 1B(i)). Mathematically speaking:  $n$  copies  
115 are drawn from the pool of  $2n$  replicon copies of the parental cell without replacement and  
116 segregate to the first daughter cell; the remaining  $n$  copies are segregated to the second  
117 daughter cell. Chromosome segregation is random or at least partially so in a range of  
118 bacterial and euryarchaeotic species (Hu et al., 2007; Schneider et al., 2007; Tobiasson and  
119 Seifert, 2010; Li, 2019). This mode moreover mimics the segregation of high-copy number  
120 plasmids (Ishii et al., 1978; Novick and Hoppensteadt, 1978; Cullum and Broda, 1979). Note  
121 that randomness in segregation in our model refers to the random segregation of replicon  
122 variants. Yet, segregation of high-copy number plasmids includes in addition randomness in  
123 the number of copies that each daughter cell inherits (Münch et al., 2015). Likewise, active



124 partitioning systems in low-copy number plasmids may only guarantee that no plasmid-  
125 free cells are generated but do not necessarily imply equal plasmid copy numbers in both  
126 daughter cells following cell division. We simplify this in our model to keep the number of  
127 cell types manageable.

128 In addition to the baseline model, we consider three further modes of segregation: (ii) *clus-*  
129 *tering of sister replicon copies*, (iii) *separation of sister replicon copies*, and (iv) *asymmetric*  
130 *inheritance of replicon copies* (Figure 1B). Sister replicon copies are pairs where one copy  
131 is the direct replicate of the other. We only consider those in combination with regular  
132 replication, which is in some cases biologically motivated (e.g., for mode (iv)) and in others  
133 mathematical convenience (e.g., for mode (iii)).

134 In the segregation mode termed *clustering of sister replicon copies* (ii), sister replicons  
135 are inherited to the same daughter cell, while in the segregation mode termed *separation*  
136 *of sister replicon copies* (iii), the sister replicons segregate into different daughter cells.  
137 *Clustering of sister replicon copies* may happen in the presence of DNA binding regula-  
138 tory elements (Wu et al., 1992), which has been recently shown to affect plasmid allele  
139 segregation under non-selective conditions (Garoña et al., 2021). It could also serve as a  
140 rough proxy of chromosome segregation when chromosome copies are spatially sorted in the  
141 cell as in *Synechococcus elongatus* (Jain et al., 2012). In this mode (ii), we only consider  
142 even copy numbers  $n$  to be able to fulfill the assumption of equal copy numbers in both  
143 daughter cells after cell division. The separation of sister replicon copies (iii) assumes that  
144 sister replicons are well separated post replication, as recently shown for haploid *Bacillus*  
145 *subtilis* chromosomes (Wang et al., 2017). The replicon separation may be achieved by  
146 active partition systems that push the replicons to the opposite cell poles such that they  
147 end up in different daughter cells at cell division, which is encoded in many low-copy-  
148 number plasmids (Nordström and Gerdes, 2003; Million-Weaver and Camps, 2014; Brooks  
149 and Hwang, 2017). *Asymmetric inheritance of replicon copies* (iv) has been proposed by

150 Sun et al. (2018) as a model for segregation of chromosomes in fast-growing bacteria, which  
151 harbor multiple chromosome copies due to multifork replication (Nielsen et al., 2007; Sun  
152 et al., 2018). Here the replicon copy number  $n$  is restricted to powers of 2. In this mode, all  
153 replicon copies remain attached to each other and form one large cluster. At cell division,  
154 only the oldest link between the replicon copies is resolved so that  $n$  copies are inherited to  
155 every daughter cell. Effectively, this means that one of the daughter cells of a heterozygous  
156 progeny cell receives all mutant copies. A mathematical description of the model is given  
157 in section A.1.

158 In our model, we track the fraction of cells carrying  $i$  mutant replicon copies over time  $t$ ,  
159 which we denote by  $x_i(t)$ . A time unit corresponds to the mean generation time of wild-type  
160 cells. For most of the analysis, we study the deterministic dynamics, which are given by  
161 a system of  $n + 1$  ordinary differential equations (Eq. (A.11), Appendix A.2). We numeri-  
162 cally integrate these equations using the Python package SciPy (Function `solve_ivp`). We  
163 determine the proportion of heterozygous cells  $x_{\text{het}} \equiv x_1 + \dots + x_{n-1}$  and the proportion  
164 of homozygous mutant cells  $x_n$  for all times  $t$ .

## 165 **Data availability**

166 The authors state that all data necessary for confirming the conclusions presented in the  
167 article are represented fully within the article. Supplementary information and figures can  
168 be found in File S1. The simulation code and the scripts used for computer algebra are  
169 stored in File S2.

## 170 Results

171 To describe the fixation dynamics, the population-wide frequency of the mutant replicon  
172 is reported at two levels: the phenotype level and the genotype level. Since we consider a  
173 dominant mutant allele, all cells that carry at least one mutant replicon copy have the same  
174 phenotype (i.e., fitness in our context). Fixation at the phenotype level is never strictly  
175 reached since new wild-type cells are constantly regenerated at divisions of heterozygous  
176 cells. Let us ignore this for a moment and denote the time by which (nearly) all cells contain  
177 at least one mutant replicon copy by  $t_{\text{phen}}$ . From the time point of mutant phenotype  
178 fixation,  $t_{\text{phen}}$ , selection is mostly restricted to the dynamics of wild-type homozygous cells  
179 that are newly generated at cell division of heterozygous cells and their few progenitors. The  
180 allele segregation process, followed by purging of wild-time homozygotes, continues until  
181 all cells have lost the wild-type replicon variant, i.e., the population is entirely composed of  
182 homozygous mutant cells. At time  $t_{\text{fix}}$ , the mutation is fixed at the genotype level, and the  
183 wild-type variant has been lost from the population. In a deterministic model, true fixation  
184 never occurs, and we define  $t_{\text{phen}}$  as the time by which 99% of cells contain at least one  
185 mutant replicon copy and  $t_{\text{fix}}$  as the time by which 99% of cells are mutant homozygotes.

186 **Phenotypic and genotypic fixation times can differ for multicopy replicons,**  
187 **leading to a ‘heterozygosity window’.**

188 Notably, fixation of the mutant allele at the genotype level can occur a long time after its  
189 fixation at the phenotype level; here, we term the time interval between these two events  
190 the *heterozygosity window* (Figure 2). The length  $\Delta t = t_{\text{fix}} - t_{\text{phen}}$  of the heterozygosity  
191 window is important since, during this phase, the population is fully adapted; yet, genetic  
192 variation is preserved. This may enable the population to quickly adapt if the selection  
193 pressure is reversed and the wild type becomes beneficial, although the potential to readily

194 respond to this new change will ultimately also depend on the dominance or recessiveness  
195 of the wild-type allele under the reversed conditions. The total time during which genetic  
196 variation persists in the population, either within cells (heterozygosity) or across cells, is  
197 given by the genotypic fixation time.

198 We find that a heterozygosity window appears if the replicon copy number  $n$  and the  
199 strength of selection  $s$  are sufficiently large (Figures 2, 3). If  $n$  and  $s$  are large, heterozygous  
200 cells rise considerably in frequency before homozygous mutant cells become frequent and  
201 take over the population. We can use this insight to derive a condition for the existence  
202 of a heterozygosity window. We find that for regular replication and small initial mutant  
203 frequencies  $f$ , heterozygous cells initially increase in frequency if

$$204 \quad s > \frac{1}{n - \frac{3}{2}} \approx \frac{1}{n} \quad \Leftrightarrow \quad sn \gtrsim 1, \quad (1)$$

205 where the last approximation holds for  $n \gg \frac{3}{2}$  (see A.3 for a mathematical derivation).  
206 This condition predicts well the boundary in the  $s$ - $n$  plane between areas with and without  
207 a heterozygosity window (Figures 3B, S2A).

208 If multicopy replicons undergo random rather than regular replication, the threshold of  $s$   
209 and  $n$  for a heterozygosity window to appear is higher. Analogous to Eq. (1), we find the  
210 condition

$$211 \quad s > \frac{4n}{2n^2 - 3n - 1} \approx \frac{2}{n} \quad \Leftrightarrow \quad sn \gtrsim 2 \quad (2)$$

213 (Figures 2 and S2B), i.e., the strength of selection needs to be twice as strong or the copy  
214 number twice as large for a heterozygosity window to appear. This is consistent with the  
215 finding that the decay of heterozygotes through replicon segregation is faster under random  
216 replication than under regular replication, where the heterozygote loss rates are  $\eta^{(\text{reg})} \approx \frac{1}{n}$   
217 and  $\eta^{(\text{ran})} \approx \frac{2}{n}$  for regular and random segregation, respectively (Eqs. (A.16) and (A.19)).

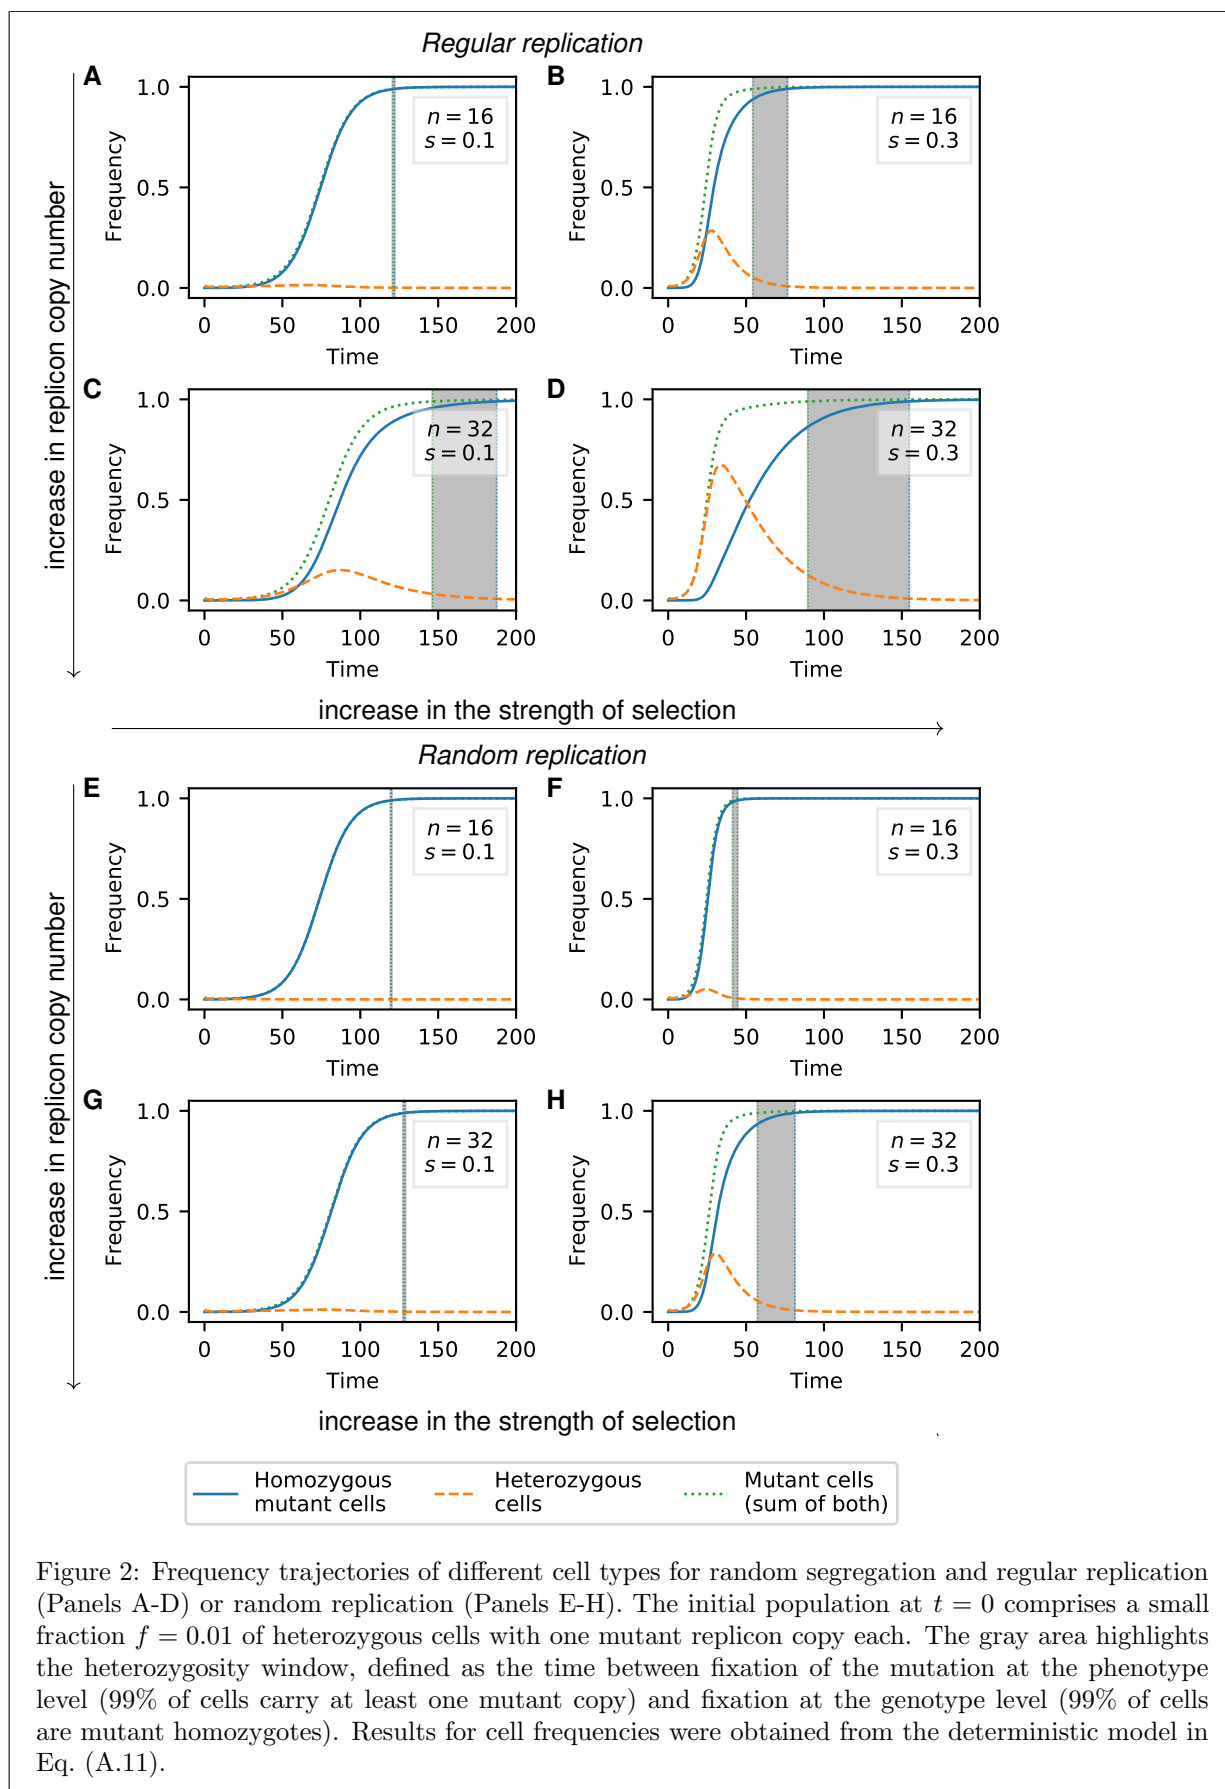

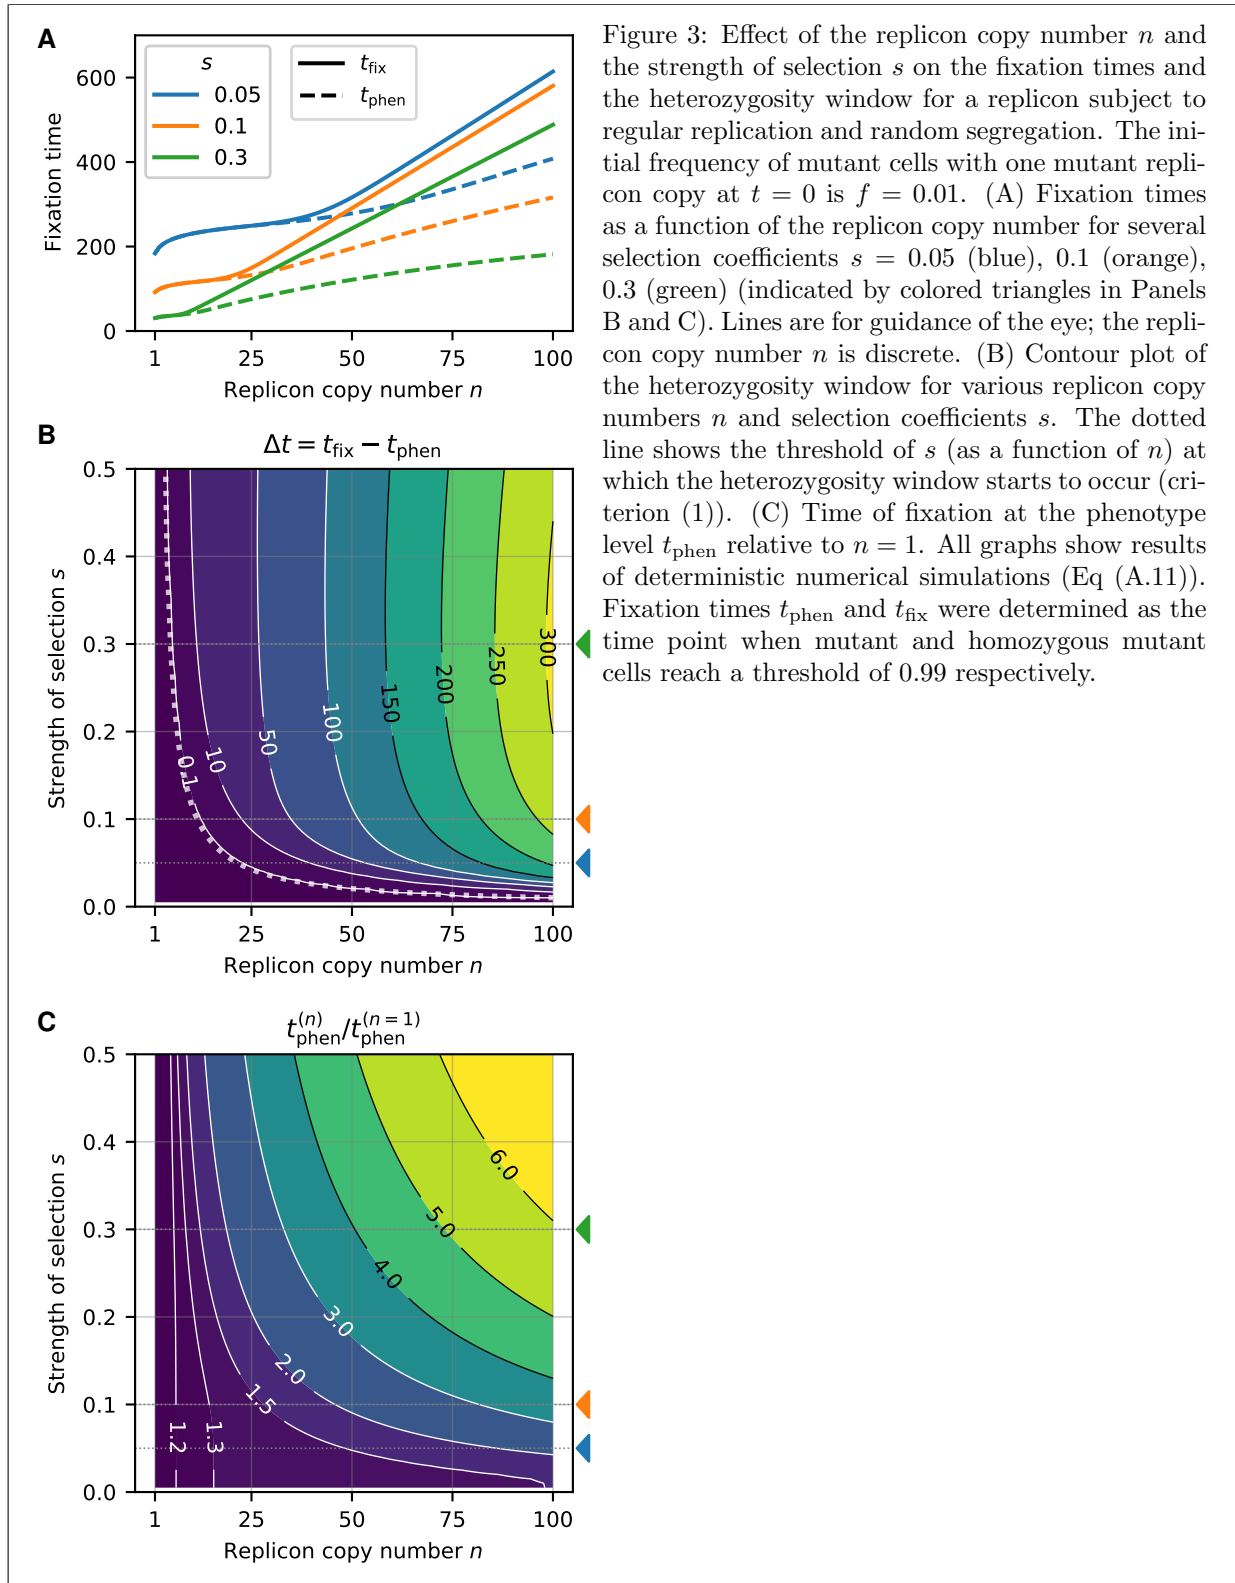

218 With our model, the choice of the fixation threshold can influence the length of the het-  
219 erozygosity window  $\Delta t$  ( $x_{\text{thr}} = 99\%$  in all results in the main text). If the initial frequency  
220 of mutant cells is very small,  $f \ll 1\%$ , the heterozygosity window length  $\Delta t$  is smaller  
221 with  $x_{\text{thr}} = 99\%$  than with a larger threshold (see Figure S1 for an example). In the limit  
222  $x_{\text{thr}} \rightarrow 1$ , however, it converges to a size that is independent of the specific choice of  $f$   
223 (see Figure S1 and supplementary information section S1 for a mathematical proof). This  
224 shows that the appearance of the heterozygosity window is a robust phenomenon and not  
225 an artifact of our specific choices of  $f$  and  $x_{\text{thr}}$ .

226 **The heterozygosity window is large if the copy number is high and the selection**  
227 **strong.**

228 The fixation times at the phenotype and genotype levels  $t_{\text{phen}}$  and  $t_{\text{fix}}$  both increase with  
229 the replicon copy number (Figure 3A). This is not a consequence of our choice of the initial  
230 condition, for which the initial frequency of mutant replicon copies  $f_{\text{rep}} = f/n$  is smaller for  
231 higher  $n$ : keeping  $f_{\text{rep}}$  rather than  $f$  constant, the fixation times are independent of  $n$  for  
232 small  $n$  and  $s$  where no heterozygosity window occurs but still increase with  $n$  otherwise  
233 (Figure S4).

234 The heterozygosity window length  $\Delta t$  increases with the replicon copy number  $n$  and –  
235 over large parts of the parameter range – with the strength of selection  $s$  (Figures 2, 3B,  
236 S5B). For very high strength of selection  $s$ , the heterozygosity window length  $\Delta t$  is again  
237 smaller due to a decrease in the overall fixation times. If scaled with the fixation time  $t_{\text{fix}}$ ,  
238 the size of the heterozygosity window  $\Delta t/t_{\text{fix}}$  monotonically increases with  $s$  and eventually  
239 converges (Figure S3).

240 A mathematical analysis of the fixation process (provided in File S1) shows that the het-

241 erozygosity window length is approximately given by

$$\Delta t \approx \frac{n}{1+s} \ln \left( \frac{2ns}{1+s} \right) \quad (3)$$

242 for regular replication and by

243

$$\Delta t \approx \frac{n/2}{1+s} \ln \left( \frac{ns}{1+s} \right) \quad (4)$$

244

245 for random replication. Hence, the implementation of random replication in the model  
246 leads to a reduced window size in a similar manner as a reduction in the replicon copy  
247 number by a factor of 2.

248 **The heterozygosity window also exists in small finite populations but is smaller.**

249 The deterministic analysis in the previous section ignores stochastic fluctuations in the  
250 genotype frequencies, reflecting the dynamics in an infinite or very large population. To  
251 account for finite population sizes, we complemented our analysis with stochastic simula-  
252 tions. Unlike in the deterministic model, the mutant allele can go extinct while rare, and we  
253 consider fixation times conditioned on fixation of the mutant allele. To render the results  
254 comparable to those of the deterministic model, we again define that phenotypic fixation is  
255 reached when 99% of cells are mutant. Similarly, fixation at the genotype level is reached  
256 when 99% of cells are homozygous mutant.

257 We find that a heterozygosity window also occurs in finite populations (Figure 4). For  
258 small populations, the heterozygosity window is smaller than predicted by the deterministic  
259 model, especially if the replicon copy number  $n$  is high (Figures 4C and D, S6).

260 For monoploid populations ( $n = 1$ ), the expected fixation time of a mutant allele decreases  
261 with the population size (Kimura and Ohta, 1969). Similarly, we find that fixation of ho-



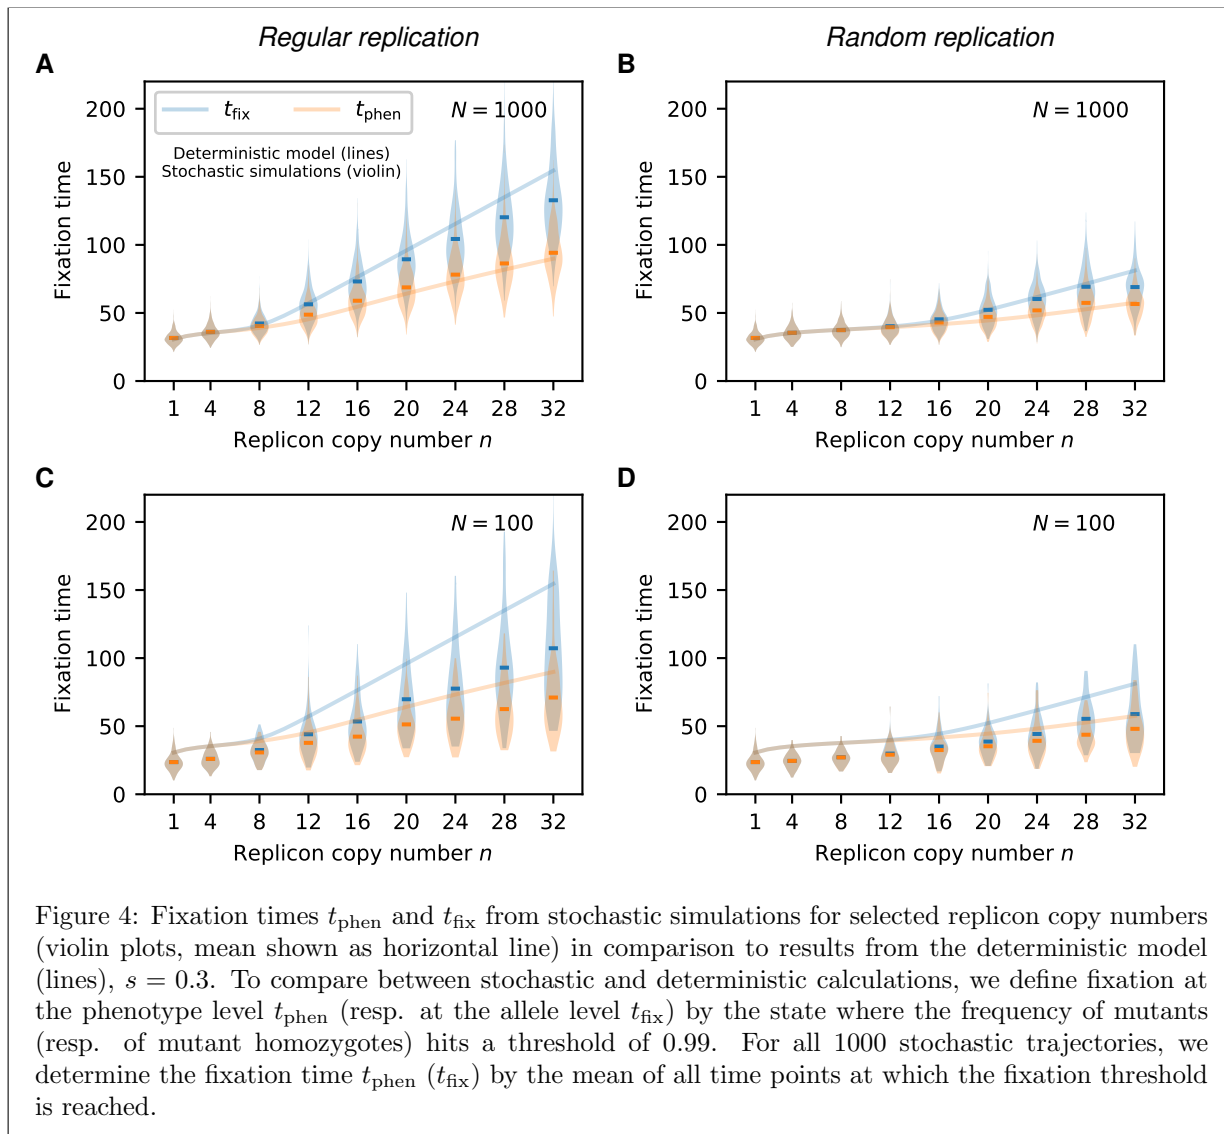

Figure 4: Fixation times  $t_{\text{phen}}$  and  $t_{\text{fix}}$  from stochastic simulations for selected replicon copy numbers (violin plots, mean shown as horizontal line) in comparison to results from the deterministic model (lines),  $s = 0.3$ . To compare between stochastic and deterministic calculations, we define fixation at the phenotype level  $t_{\text{phen}}$  (resp. at the allele level  $t_{\text{fix}}$ ) by the state where the frequency of mutants (resp. of mutant homozygotes) hits a threshold of 0.99. For all 1000 stochastic trajectories, we determine the fixation time  $t_{\text{phen}}$  ( $t_{\text{fix}}$ ) by the mean of all time points at which the fixation threshold is reached.

262 mozygous mutant cells  $t_{\text{fix}}$  is faster in finite populations than predicted by the deterministic  
 263 model; furthermore, the time to fixation decreases with the population size (Figure 4). The  
 264 phenotypic fixation time  $t_{\text{phen}}$ , however, reaches a maximum for an intermediate population  
 265 size (cf. the fixation times for  $N = 1000$  with those for  $N = 100$  and those predicted by  
 266 the deterministic model reflecting an infinite population in Figures 4A and S6).

267 **A heterozygosity window also exists if the cell-type frequencies are in trans-**  
268 **formation-selection balance prior to adaptation.**

269 So far, we assumed a given initial frequency  $f$  of mutant cells where each of those cells  
270 carries one mutant copy. This corresponds, for example, to the cell-type composition after  
271 incorporating a mutant allele into the plasmid via transformation (e.g., Garoña et al., 2021).  
272 In natural settings, however, mutations are often present at low levels for a long time in a  
273 balance between negative selection and recurrent appearance before they become beneficial  
274 due to a shift in the environmental conditions. In that case, cells with more than one  
275 mutant replicon copy may arise before the fixation process ensues.

276 In the following, we therefore model two phases – the first one, in which the mutant allele is  
277 subject to negative selection, modeled by a reduced cell division rate  $1 - \sigma$  of mutant cells,  
278 and a second one, when it has turned beneficial and rises to fixation. For the first phase, we  
279 assume that the mutant allele appears in single replicon copies at a transformation rate  $\tau$  per  
280 cell per time unit and determine the mutant cell frequencies in the equilibrium between the  
281 input of the mutant allele via transformation and loss due to negative purifying selection.  
282 At time point  $t = 0$ , the mutant allele becomes beneficial, i.e., mutant cells divide at rate  
283  $1 + s$  as in the above sections. A detailed description of the model is given in Appendix A.4.

284 Overall, we find that the general pattern of the heterozygosity window occurrence remains  
285 unchanged, irrespective of  $\tau$  and  $\sigma$ : a window opens up for sufficiently large  $n$  (Figure 5).

286 Strongly deleterious mutations (cell division rate  $1 - \sigma$  close to 0) mostly occur in heterozy-  
287 gous cells with few mutated replicon copies in transformation-selection balance (Figures 5A-  
288 D). Furthermore, the frequency of mutant cells is nearly independent of  $n$  (Figures 5B and  
289 D). For very low transformation rates, most of the mutant cells contain a single mutant  
290 replicon copy, which resembles the scenario that we considered in the above sections (Fig-  
291 ure 5A). For high transformation rates, cells with more than one mutant replicon copy

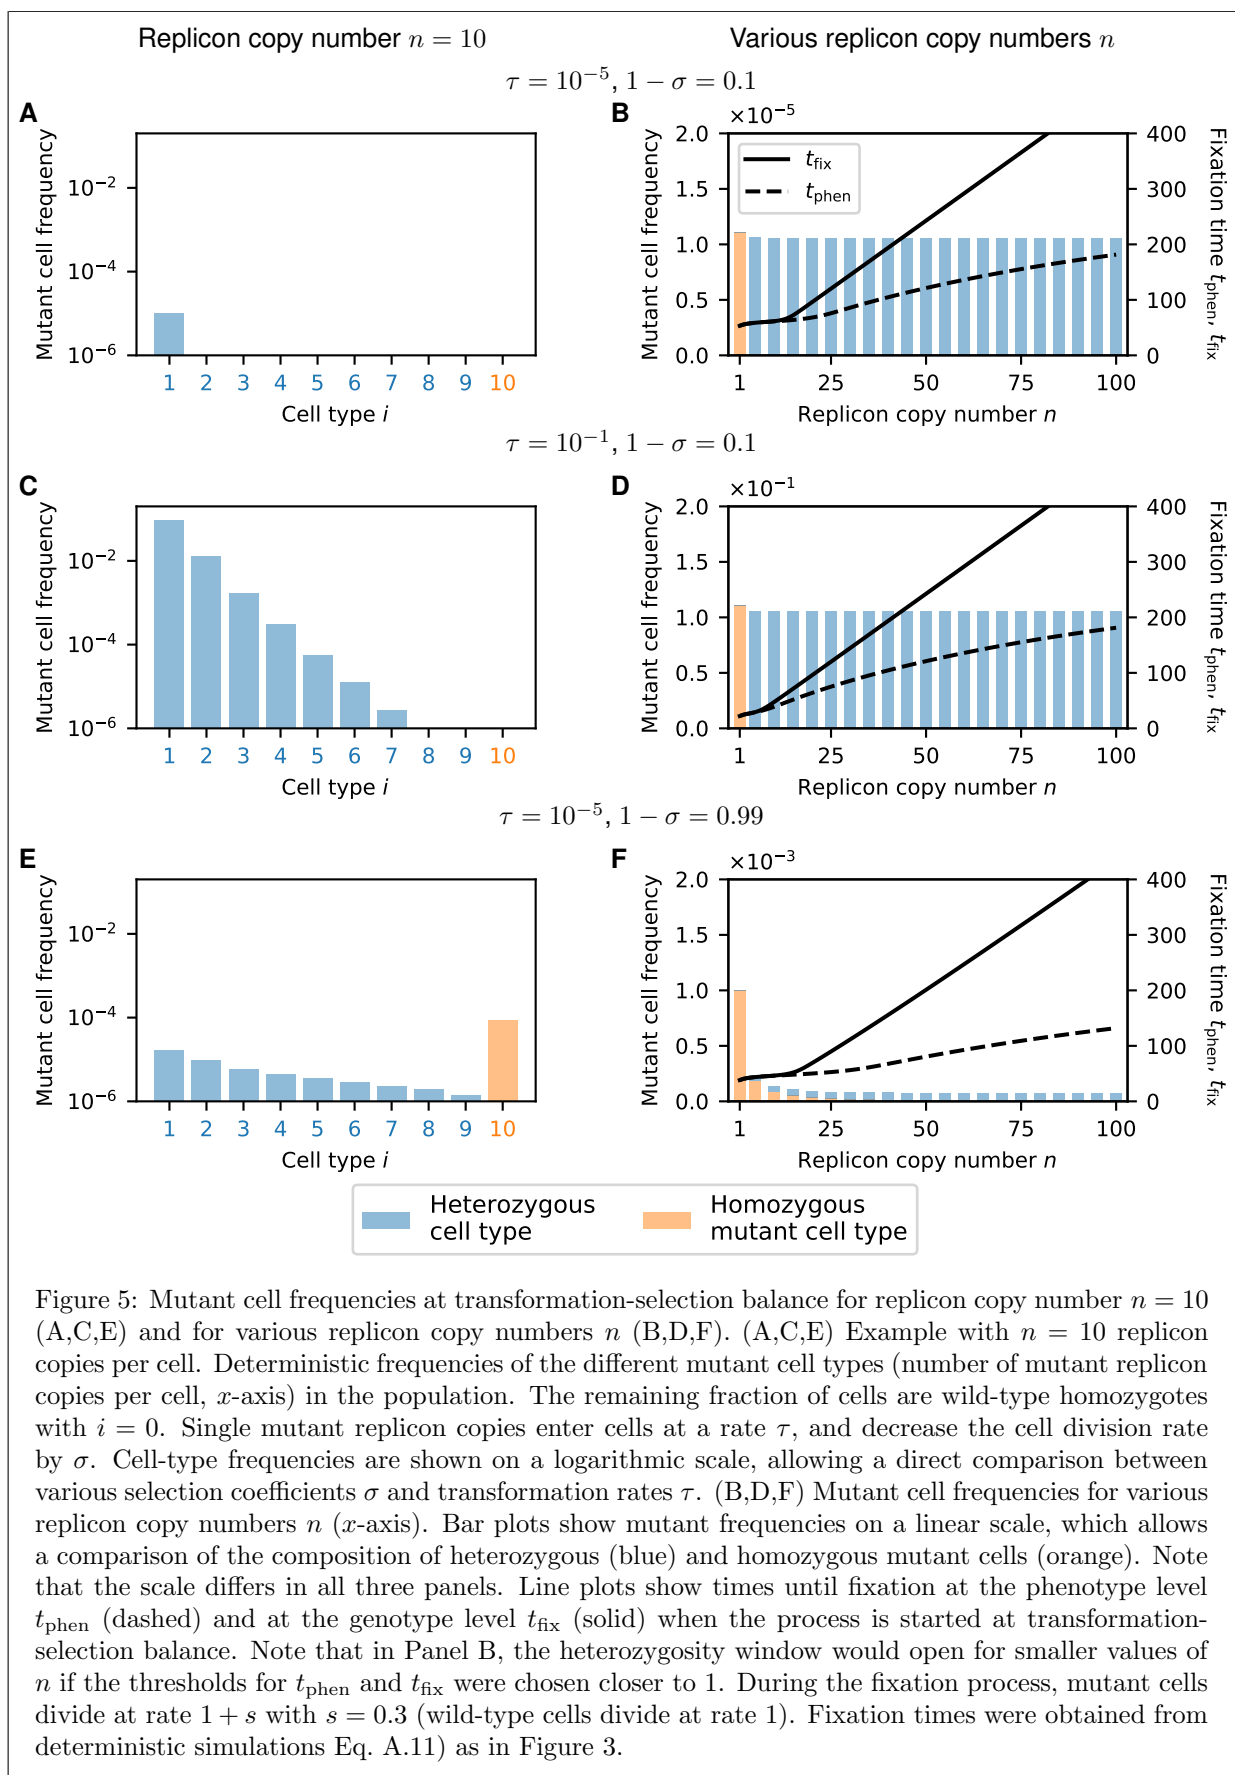

Figure 5: Mutant cell frequencies at transformation-selection balance for replicon copy number  $n = 10$  (A,C,E) and for various replicon copy numbers  $n$  (B,D,F). (A,C,E) Example with  $n = 10$  replicon copies per cell. Deterministic frequencies of the different mutant cell types (number of mutant replicon copies per cell,  $x$ -axis) in the population. The remaining fraction of cells are wild-type homozygotes with  $i = 0$ . Single mutant replicon copies enter cells at a rate  $\tau$ , and decrease the cell division rate by  $\sigma$ . Cell-type frequencies are shown on a logarithmic scale, allowing a direct comparison between various selection coefficients  $\sigma$  and transformation rates  $\tau$ . (B,D,F) Mutant cell frequencies for various replicon copy numbers  $n$  ( $x$ -axis). Bar plots show mutant frequencies on a linear scale, which allows a comparison of the composition of heterozygous (blue) and homozygous mutant cells (orange). Note that the scale differs in all three panels. Line plots show times until fixation at the phenotype level  $t_{\text{phen}}$  (dashed) and at the genotype level  $t_{\text{fix}}$  (solid) when the process is started at transformation-selection balance. Note that in Panel B, the heterozygosity window would open for smaller values of  $n$  if the thresholds for  $t_{\text{phen}}$  and  $t_{\text{fix}}$  were chosen closer to 1. During the fixation process, mutant cells divide at rate  $1 + s$  with  $s = 0.3$  (wild-type cells divide at rate 1). Fixation times were obtained from deterministic simulations Eq. A.11) as in Figure 3.

292 exist, which reduces fixation times for low-copy replicons but not for high-copy replicons  
293 (compare Figures 5B and D).

294 If the strength of selection is weak ( $1 - \sigma$  close to 1), mutant cells can persist longer in  
295 the population on average. Therefore homozygous mutant cells can be generated and exist  
296 at transformation-selection balance for low-copy numbers (Figures 5E and F). For high  
297 replicon copy numbers  $n$ , however, too many generations would be needed for homozygous  
298 cells to emerge; thus, almost all mutant cells are heterozygous at transformation-selection  
299 balance even if selection is weak. Unlike for strong selection, the overall frequencies of  
300 mutant cells strongly decrease with  $n$ . Nonetheless, for high  $n$ , fixation times are smaller  
301 compared to the case of strong selection (Figure 5F and B).

302 **The mode of replicon segregation strongly influences the occurrence and length**  
303 **of a heterozygosity window.**

304 In the previous sections, we considered random segregation of replicon copies at cell division.  
305 Here, we examine the effect of alternative segregation modes on the fixation dynamics  
306 (Figure 1). All three alternative modes in our model reflect a more deterministic form of  
307 replicon inheritance compared to the baseline model of random segregation.

308 Notably, the *clustering of sister replicon copies* segregation mode reduces the unit of inher-  
309 itance – that is, the number of segregating DNA molecules – by a factor of two compared  
310 to random segregation (1). The fixation dynamics under *clustering of sister replicon copies*  
311 with copy number  $2n$ , therefore, resembles the resulting dynamics under random segrega-  
312 tion with replicon copy number  $n$ . Both the fixation time of mutant cells and of homozygous  
313 mutant cells are reduced and the heterozygosity window is smaller if sister replicons segre-  
314 gate into the same cell than if they segregate independently from each other (Figures 6A  
315 and S7A, cf. 2D and 3A for the baseline model with random segregation). In line with our

316 other results on random and regular replication (Eq. 3 and 4), fixation times  $t_{\text{phen}}$  and  $t_{\text{fix}}$   
 317 and the size of the heterozygosity window for *clustering of sister replicon copies* are very  
 318 similar to those obtained for random replication (cf. Figures S5A and S7A).

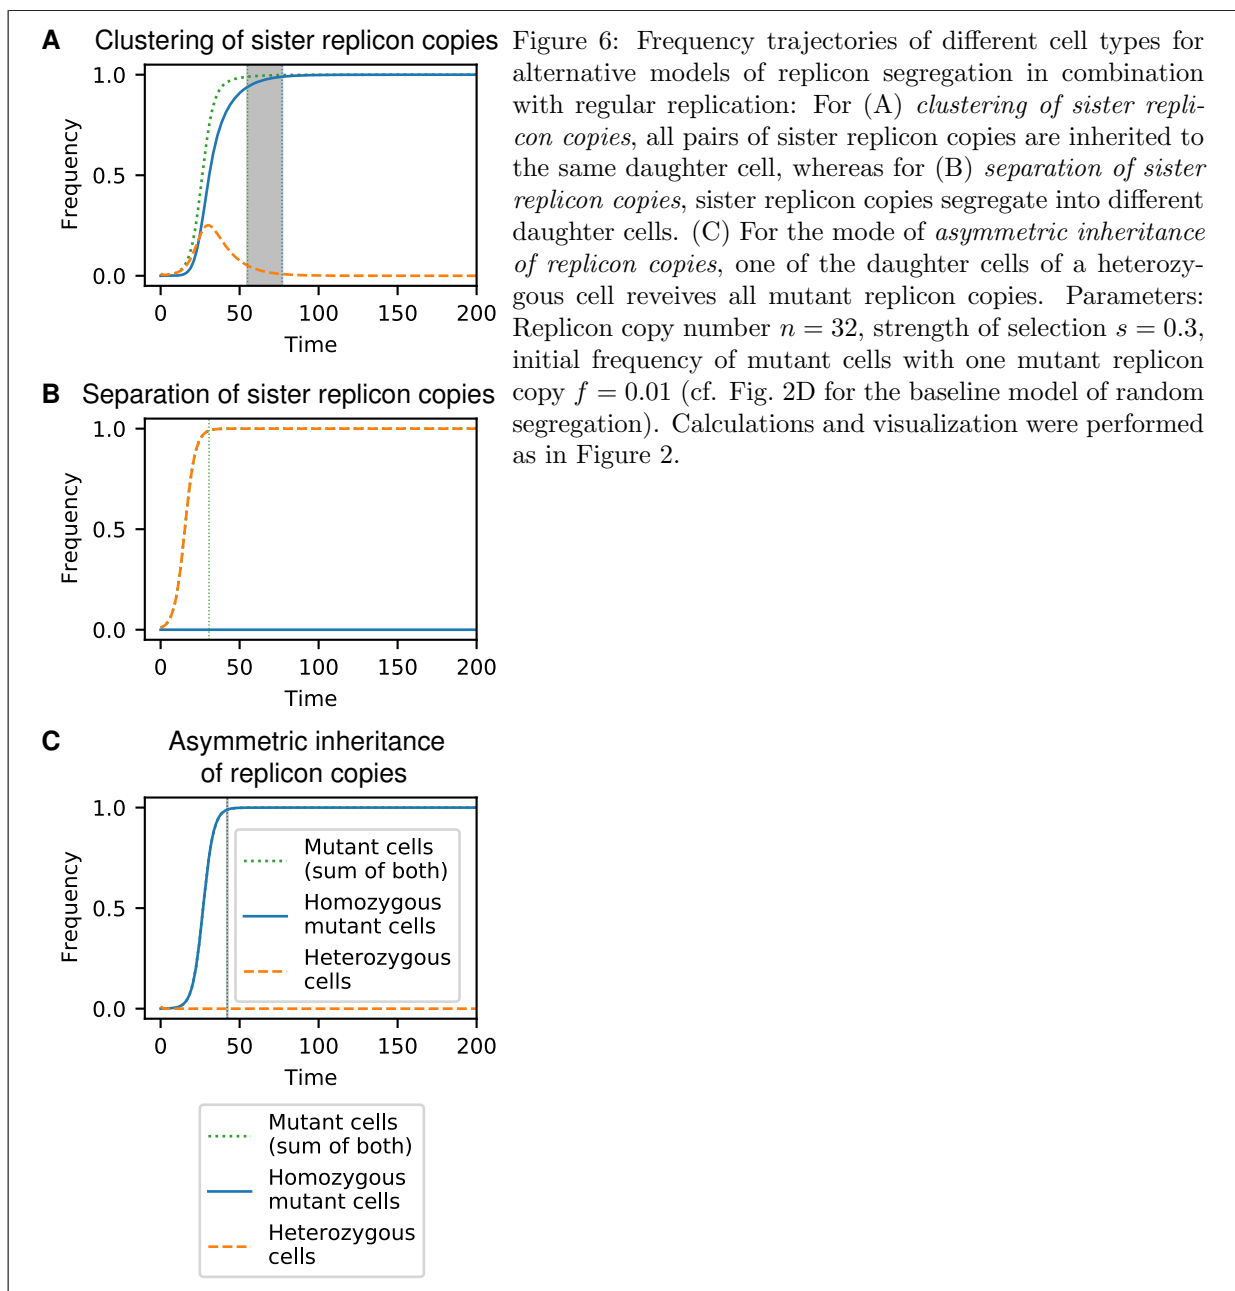

319 Under the mode of *separation of sister replicon copies*, cells with  $i$  mutant replicon copies  
 320 always produce two daughter cells of the same type  $i$  since every sister couple is equally

321 divided between the two daughter cells. Hence, the mutation will never reach fixation  
322 at the genotype level (Figure 6B), and in the absence of gene conversion and without  
323 deviations from the model, heterozygosity is maintained forever. The fixation dynamics at  
324 the phenotypic level are effectively reduced to the case  $n = 1$  as wild-type cells divide into  
325 wild-type cells, and mutant cells divide into mutant cells of the same type  $i$  (Figure S7B).  
326 Consequently, the fixation time of mutant cells is independent of the replicon copy number  
327 in the *separation of sister replicon copies* mode.

328 Last, we consider the *asymmetric inheritance of replicon copies* mode, which reflects a  
329 more extreme scenario of sister replicon clustering. Following the mode of asymmetric  
330 inheritance, heterozygous cells always divide into one heterozygote and one homozygous  
331 cell. Consequently, there is no increase in heterozygous cells, and no heterozygosity window  
332 appears (Figure 6C). A comparison of the fixation dynamics for different replicon copy num-  
333 bers shows that the fixation time increases slightly with the copy number  $n$  (Figure S7C).  
334 The reason for this increase is the smaller initial mutant replicon frequency on the allele  
335 level  $f_{\text{rep}} = f/n$  for higher  $n$ . For a constant initial mutant frequency on the allele level  
336  $f_{\text{rep}} = f/n$ , the fixation time is independent of the copy number  $n$  in this inheritance mode  
337 (cf. Figure S8).

## 338 Discussion

339 To understand the consequences of polyploidy for allele dynamics in prokaryotes, we con-  
340 sidered the fixation process of a dominant beneficial mutation on a multicopy replicon.

## 341 Maintenance of heterozygosity on multicopy replicons

342 Our initial model in which replication is regular and segregation random shows that fixation  
343 times are longer on multicopy replicons than on single-copy replicons and increase with the  
344 copy number. This is generally in line with experimental and theoretical results by Ilhan  
345 et al. (2019), who simulated the distribution of replicon copy variants in the daughter cells  
346 and the cell composition in the next generation by binomial sampling. For large copy  
347 numbers and strong selection (see Eq. 1), we moreover find a delay between fixation at the  
348 phenotype level and fixation at the genotype level, which we term ‘heterozygosity window’.  
349 Within the heterozygosity window, the population is phenotypically fully adapted, while  
350 genetic variation is maintained. For example, *de novo* evolution of antibiotic resistance  
351 would be reversible during the heterozygosity window if antibiotics are removed, and the  
352 resistance mutation has a negative fitness effect in the absence of antibiotics. Importantly,  
353 such a reversible adaptation would leave no trace in the genome. However, how easily the  
354 population can adapt to such a future change also depends on the dominance relationship  
355 between the two alleles in the new environment (e.g., antibiotic-free environment), and  
356 future models are needed to assess this. In our model, no heterozygosity window emerges  
357 if selection is weak or the copy number is low. These results hold, irrespective of whether  
358 the adaptive process starts from a constant low fraction of mutant cells with one mutant  
359 copy each, a constant low fraction of mutant replicon copies (with no more than one copy  
360 in each cell), or from transformation-selection balance (Fig. 3A and Fig. 5).

361 The existence of a heterozygosity window can be understood in the following way: if  
362 selection is strong, heterozygous cells quickly rise in frequency. At the same time, if the copy  
363 number is large, homozygous cells emerge only slowly, and the mutant cells become fixed  
364 before mutant homozygotes dominate the population. From this point on, the process is  
365 selectively neutral except for homozygous wild types that are generated during cell division.  
366 The emergence of such wild-type cells is rare for high replicon copy numbers such that the

367 fixation of homozygous mutant cells is slow. If selection is weak or the copy number  
368 low, homozygous mutant cells are generated early in the adaptive process. They quickly  
369 rise in frequency since all daughter cells of homozygous cells are themselves homozygous.  
370 Heterozygous cells, in contrast, rise only little or not at all since they segregate too many  
371 offspring into the homozygous classes. In that scenario, phenotypic fixation coincides with  
372 genotypic fixation.

373 Most of our analysis relies on a deterministic model for the genotype frequencies in the  
374 population. Stochastic simulations show that the heterozygosity window is smaller than  
375 predicted by the deterministic model if the population size is small, but qualitatively, the  
376 results also hold in small finite populations. Additionally, we find that the phenotypic  
377 fixation time has a maximum for intermediate population sizes.

378 In the present study, we focused on dominant mutant alleles, where a heterozygosity window  
379 is expected to be most prominent. For a recessive mutant allele, heterozygous cells have no  
380 selective advantage over wild-type cells, and therefore do not rise in frequency by natural  
381 selection. Once homozygous mutant cells finally emerge, they rapidly rise to fixation. The  
382 dynamics of mutant alleles of intermediate dominance (i.e., the cell fitness increases with the  
383 frequency of the mutant allele) are positioned between these two extremes, and the effects  
384 leading to a heterozygosity window would be less pronounced than for a dominant mutation.  
385 This is likely similar for alleles with a gene dosage effect (i.e., where the phenotype depends  
386 on the number of mutant replicon copies).

387 Experimentally, an initial rise and subsequent decline of heterozygotes and a heterozygosity  
388 window have been observed in invasion experiments of a beneficial allele on a multicopy  
389 plasmid (see Fig. 3 in Rodriguez-Beltran et al., 2018). Complementary computer simu-  
390 lations show that heterozygosity can be maintained for many generations if the selection  
391 pressures for the two alleles rapidly alternate. In these simulations, Rodriguez-Beltran et al.



392 (2018) made the simplifying assumption that all heterozygous cells contain the two plasmid  
393 variants in equal proportions, i.e., there are only three cell types – the two homozygous  
394 types and heterozygous cells. Assuming that plasmid copies segregate to the daughter cells  
395 with probability  $1/2$ , the probability that a heterozygous cell forms two homozygous cells at  
396 cell division is  $2^{1-n}$  (using our model formulation, where plasmid copies are replicated prior  
397 to cell division). Using this assumption,  $2^{1-n}$  is the heterozygote loss rate in the absence of  
398 selection (see A.3, Eq. (A.16)). Our analysis, which explicitly considers heterozygous cells  
399 with different compositions of the replicon pool, shows that the heterozygote loss rate is  
400 more accurately described by  $\eta^{(reg)} = \frac{1}{n-1/2} \approx \frac{1}{n}$  for regular replication (see Eq. (A.16)).  
401 Comparing these two results shows that the approximation in Rodriguez-Beltran et al.  
402 (2018) underestimates the loss rate, especially for high replicon copy numbers  $n$ . Similar  
403 to our model, Novick and Hoppensteadt (1978) calculated the decrease in the proportion  
404 of heterozygous cells per generation in a geometrically growing population as  $\frac{1}{2n-1} \approx \frac{1}{2n}$  for  
405 plasmid copies undergoing regular replication. The difference of a factor  $1/2$  between the  
406 loss rate in our model and the loss rate in Novick and Hoppensteadt (1978) is due to the  
407 different population dynamics in the two models (constant population size vs geometric  
408 growth).

409 It is interesting to compare fixation on a multicopy replicon in an asexually reproducing  
410 population to the fixation of a beneficial allele in a diploid sexually reproducing population:  
411 in the latter, there is also a heterozygosity window for dominant (but not for recessive)  
412 alleles (Fig. S9). The underlying dynamics are, however, very different since the generation  
413 of homozygous individuals requires mating of heterozygous individuals, and mating of the  
414 two homozygous types re-generates heterozygous individuals.

## 415 **The effects of the segregation and replication modes**

416 The modes of replication and segregation depend on the respective replicon type and on  
417 the species. In our study, we consider several fundamental modes for both processes. In the  
418 future, the model can be tailored to accurately describe the details of specific systems. For  
419 most of our analysis, we assumed that each replicon copy is replicated exactly once prior to  
420 cell division (regular replication). We considered four modes of replicon copy segregation.  
421 In all modes considered, both daughter cells inherit the same number of replicon copies,  
422 but the segregation mode affects the allele distribution in the daughter cells and hence  
423 the maintenance or loss of intracellular genetic variation. Under the mode *separation of*  
424 *sister replicon copies*, the heterozygosity window is infinitely long, i.e., heterozygosity is  
425 maintained forever. The complete opposite dynamics occurs under the mode of *asymmetric*  
426 *inheritance of replicon copies* where one of the daughter cells inherits the maximum possible  
427 number of mutant copies. In that case, heterozygous cells do not increase in frequency  
428 since cell division of heterozygotes leads to one heterozygous cell and one homozygous cell.  
429 Thus, in monoploid bacteria that become effectively polyploid during fast growth due to  
430 multifork replication, heterozygosity will rapidly decrease, and no heterozygosity window  
431 arises. The results obtained applying the modes of *random segregation* and of *clustering of*  
432 *sister replicon copies* lie between perfect separation of copies and asymmetric inheritance.  
433 In these modes, heterozygous subpopulations can rise transiently, given that the replicon  
434 copy number and the strength of selection are sufficiently high, and a heterozygosity window  
435 opens up. Since the replication of plasmids and likely also of some types of chromosomes  
436 is better described by random than by regular replication of copies, we also modeled the  
437 replication mode *random replication* (in combination with random segregation of replicon  
438 copies). In that case, the heterozygosity window is also present but smaller than under  
439 regular replication. Notably, our results show that it is approximately as large as for a  
440 regularly replicating replicon with a copy number  $n/2$ . E.g., for a plasmid with copy

441 number  $n \approx 20$  that is undergoing random replication and segregation, there is only a  
442 delay of a few (wild-type) generations between phenotypic and genotypic fixation even  
443 if selection for the mutant allele is strong (Fig. S5). For a replicon undergoing regular  
444 replication, there would be a delay of around 40 generations with  $s = 0.3$  (Fig. 3).

445 Our modeling framework could be applied to support experimental studies in polyploid  
446 species. The mode of chromosome segregation differs between prokaryotic species and is  
447 not always well understood. Following the fate of heterozygous cells has been used as  
448 one approach to gain insights into the segregation patterns (e.g., Pulakat et al., 1998; Suh  
449 et al., 2000; Tobiasson and Seifert, 2010; Li, 2019). With our modeling framework, we can  
450 make quantitative predictions on the maintenance of heterozygosity and the time to loss or  
451 fixation of a marker. This makes it possible to test on a quantitative basis which segrega-  
452 tion patterns are compatible with experimental observations and thus to better understand  
453 which conclusions can and cannot be drawn. A second application of our model concerns  
454 genetic engineering. Genetic engineering is known to be difficult in highly polyploid species  
455 such as *Synechocystis PCC 6803*, which carries approximately 60 chromosome copies per  
456 cell (Griese et al., 2011). To incorporate an allele into all chromosome copies, positive  
457 selection for this allele needs to be applied for a large number of generations. If selection  
458 is released too early, reversion to the wild type may occur. Our model allows us to es-  
459 timate the required number of generations in advance. There is, however, a caveat with  
460 applying our current model to experimental studies: we here assume a constant population  
461 size, while in most experiments, the population size drastically changes in the alternation  
462 between exponential growth and population bottlenecks. This very likely affects the size of  
463 the heterozygosity window. Yet, our model can be readily adjusted to account for such pop-  
464 ulation dynamics, e.g., by replacing the Moran model by a birth-death model and including  
465 bottlenecks at regular intervals.

466 In this study, we focused on the dynamics of multicopy replicon copies in prokaryotes.

467 Similar dynamics and questions arise for polyploid eukaryotic cells. Mitotic cell division  
468 leads to a division of sister replicon copies. Some replicon types in eukaryotes, however,  
469 do not undergo mitosis, for example, chromosomes in the somatic macronucleus of ciliates  
470 (Morgens and Cavalcanti, 2015), nuclear extra-chromosomal DNA (ecDNA) in tumor cells  
471 (Bailey et al., 2020), mitochondria and other organelles (Lightowers et al., 1997; Stew-  
472 art and Chinnery, 2015; Ramsey and Mandel, 2019). Specifically, heteroplasmy is known  
473 to occur in mitochondria, and the spread of mutations in mitochondrial DNA through  
474 replication of mutated copies and segregation at cell division within an organism or across  
475 generations is highly relevant in the context of disease development (Lawless et al., 2020).  
476 In all the above cases – macronucleus of ciliates, ecDNA, mitochondria and other organelles  
477 –, the segregation of replicon copies is random or at least partially so, and related modeling  
478 approaches have been applied to either study variation in the number of replicon copies or  
479 of genetic variants (e.g., Kimura, 1957; Morgens and Cavalcanti, 2015; Pichugin et al., 2019;  
480 Lawless et al., 2020). Our results could thus also be of interest for multicopy replicons in  
481 eukaryotes.

482 **Conclusion.** Heterozygosity is commonly considered in diploid sexually reproducing or-  
483 ganisms. Prokaryotic cells can be heterozygous as well if they harbour a multicopy replicon,  
484 i.e., a polyploid chromosome or a multicopy plasmid. The present work demonstrates that  
485 heterozygosity of multicopy replicons, hence genetic variation, can be maintained for ex-  
486 tended periods of time – the heterozygosity window – during the fixation process of a  
487 dominant beneficial mutation.

## 488 Acknowledgements

489 The authors thank Florence Bansept and Arne Traulsen for helpful discussions. We thank  
490 Giddy Landan for critical comments on the manuscript. M.S. is a member of the Interna-

491 tional Max Planck Research School for Evolutionary Biology and gratefully acknowledges  
492 the benefits provided by the program.

## 493 **References**

494 C. Bailey, M. Shoura, P. Mischel, and C. Swanton. Extrachromosomal DNA—relieving  
495 heredity constraints, accelerating tumour evolution. *Annals of Oncology*, 31(7):884–893,  
496 2020.

497 J. A. Bogan, J. E. Grimwade, M. Thornton, P. Zhou, G. D. Denning, and C. E. Helmstetter.  
498 P1 and NR1 plasmid replication during the cell cycle of escherichia coli. *Plasmid*, 45(3):  
499 200–208, 2001.

500 S. Breuert, T. Allers, G. Spohn, and J. Soppa. Regulated polyploidy in halophilic archaea.  
501 *PLoS ONE*, 1(1):e92, 2006.

502 A. C. Brooks and L. C. Hwang. Reconstitutions of plasmid partition systems and their  
503 mechanisms. *Plasmid*, 91:37–41, 2017.

504 J. Cullum and P. Broda. Rate of segregation due to plasmid incompatibility. *Genetical*  
505 *Research*, 33(1):61–79, 1979.

506 F. Eggenberger and G. Pólya. Über die Statistik verketteter Vorgänge. *ZAMM - Journal*  
507 *of Applied Mathematics and Mechanics / Zeitschrift für Angewandte Mathematik und*  
508 *Mechanik*, 3(4):279–289, 1923.

509 K. Friehs. Plasmid copy number and plasmid stability. In T. Scheper, editor, *New Trends*  
510 *and Developments in Biochemical Engineering*, pages 47–82. Springer, Berlin, Heidelberg,  
511 2004.

- 512 A. Garoña, N. F. Hülter, D. R. Picazo, and T. Dagan. Segregational drift constrains  
513 the evolutionary rate of prokaryotic plasmids. *Molecular Biology and Evolution*, 38(12):  
514 5610–5624, 2021.
- 515 D. T. Gillespie. A general method for numerically simulating the stochastic time evolution  
516 of coupled chemical reactions. *Journal of Computational Physics*, 22:403–434, 1976.
- 517 M. Griese, C. Lange, and J. Soppa. Ploidy in cyanobacteria. *FEMS Microbiology Letters*,  
518 323(2):124–131, 2011.
- 519 F. Guerrini and M. S. Fox. Genetic heterozygosity in pneumococcal transformation. *Pro-*  
520 *ceedings of the National Academy of Sciences*, 59(2):429–436, 1968.
- 521 A. D. Halleran, E. Flores-Bautista, and R. M. Murray. Quantitative characterization of  
522 random partitioning in the evolution of plasmid-encoded traits. *bioRxiv*, 2019.
- 523 C. Hildenbrand, T. Stock, C. Lange, M. Rother, and J. Soppa. Genome copy numbers and  
524 gene conversion in methanogenic archaea. *Journal of Bacteriology*, 193(3):734–743, 2011.
- 525 B. Hu, G. Yang, W. Zhao, Y. Zhang, and J. Zhao. MreB is important for cell shape but  
526 not for chromosome segregation of the filamentous cyanobacterium *Anabaena* sp. PCC  
527 7120. *Molecular Microbiology*, 63(6):1640–1652, 2007.
- 528 J. Ilhan, A. Kupczok, C. Woehle, T. Wein, N. F. Hülter, P. Rosenstiel, G. Landan, I.  
529 Mizrahi, and T. Dagan. Segregational drift and the interplay between plasmid copy  
530 number and evolvability. *Molecular Biology and Evolution*, 36(3):472–486, 2019.
- 531 D. Ionescu, M. Bizic-Ionescu, N. D. Maio, H. Cypionka, and H.-P. Grossart. Community-  
532 like genome in single cells of the sulfur bacterium *Achromatium oxaliferum*. *Nature*  
533 *Communications*, 8(1):455, 2017.
- 534 K. Ishii, T. Hashimoto-Gotoh, and K. Matsubara. Random replication and random assort-  
535 ment model for plasmid incompatibility in bacteria. *Plasmid*, 1(4):435–445, 1978.

- 536 V. N. Iyer. Unstable genetic transformation in *Bacillus subtilis* and the mode of inheritance  
537 in unstable clones. *Journal of Bacteriology*, 90(2):495–503, 1965.
- 538 I. H. Jain, V. Vijayan, and E. K. O’Shea. Spatial ordering of chromosomes enhances  
539 the fidelity of chromosome partitioning in cyanobacteria. *Proceedings of the National  
540 Academy of Sciences*, 109(34):13638–13643, 2012. doi: 10.1073/pnas.1211144109.
- 541 M. Kimura. Some problems of stochastic processes in genetics. *The Annals of Mathematical  
542 Statistics*, 28(4):882 – 901, 1957.
- 543 M. Kimura and T. Ohta. The average number of generations until fixation of a mutant  
544 gene in a finite population. *Genetics*, 61(3):763–71, 1969.
- 545 C. Lawless, L. Greaves, A. K. Reeve, D. M. Turnbull, and A. E. Vincent. The rise and rise  
546 of mitochondrial DNA mutations. *Open Biology*, 10(5):200061, 2020.
- 547 H. Li. Random chromosome partitioning in the polyploid bacterium *Thermus thermophilus*  
548 HB27. *G3: Genes, Genomes, Genetics*, 9(4):g3.400086.2019, 2019.
- 549 R. N. Lightowers, P. F. Chinnery, D. M. Turnbull, and N. Howell. Mammalian mitochon-  
550 drial genetics: heredity, heteroplasmy and disease. *Trends in Genetics*, 13(11):450–455,  
551 1997.
- 552 H. Mahmoud. *Polya Urn Models*. Chapman & Hall/CRC, 1 edition, 2008.
- 553 R. Maldonado, J. Jiménez, and J. Casadesús. Changes of ploidy during the *Azotobacter*  
554 *vinelandii* growth cycle. *Journal of Bacteriology*, 176(13):3911–3919, 1994.
- 555 S. Million-Weaver and M. Camps. Mechanisms of plasmid segregation: Have multicopy  
556 plasmids been overlooked? *Plasmid*, 75:27–36, 2014.
- 557 P. A. P. Moran. Random processes in genetics. *Mathematical Proceedings of the Cambridge  
558 Philosophical Society*, 54(1):60–71, 1958.

- 559 D. W. Morgens and A. R. Cavalcanti. Amitotic chromosome loss predicts distinct patterns  
560 of senescence and non-senescence in ciliates. *Protist*, 166(2):224–233, 2015.
- 561 M. L. Morse, E. M. Lederberg, and J. Lederberg. Transduction in Escherichia Coli K-12.  
562 *Genetics*, 41(1):142–56, 1956.
- 563 K. M. Münch, J. Müller, S. Wienecke, S. Bergmann, S. Heyber, R. Biedendieck, R. Münch,  
564 and D. Jahn. Polar Fixation of Plasmids during Recombinant Protein Production in  
565 Bacillus megaterium Results in Population Heterogeneity. *Applied and Environmental*  
566 *Microbiology*, 81(17):5976–5986, 2015. doi: 10.1128/aem.00807-15.
- 567 H. J. Nielsen, B. Youngren, F. G. Hansen, and S. Austin. Dynamics of Escherichia coli  
568 chromosome segregation during multifork replication. *Journal of Bacteriology*, 189(23):  
569 8660–8666, 2007.
- 570 K. Nordström. Plasmid R1—replication and its control. *Plasmid*, 55(1):1–26, 2006.
- 571 K. Nordström and S. Dasgupta. Copy-number control of the Escherichia coli chromosome:  
572 a plasmidologist’s view. *EMBO reports*, 7(5):484–489, 2006.
- 573 K. Nordström and K. Gerdes. Clustering versus random segregation of plasmids lacking a  
574 partitioning function: a plasmid paradox? *Plasmid*, 50(2):95–101, 2003.
- 575 R. P. Novick and F. Hoppensteadt. On plasmid incompatibility. *Plasmid*, 1(4):421–434,  
576 1978.
- 577 R. Ohbayashi, A. Nakamachi, T. S. Hatakeyama, S. Watanabe, Y. Kanasaki, T. Chibaza-  
578 kura, H. Yoshikawa, S. Miyagishima, J. Soppa, and R. Losick. Coordination of polyploid  
579 chromosome replication with cell size and growth in a cyanobacterium. *mBio*, 10(2):  
580 e00510–19, 2019.
- 581 Y. Pichugin, W. Huang, and B. Werner. Stochastic dynamics of extra-chromosomal DNA.  
582 *bioRxiv*, 2019.



- 583 L. Pulakat, E. T. Efuat, and N. Gavini. Segregation pattern of kanamycin resistance marker  
584 in *Azotobacter vinelandii* did not show the constraints expected in a polyploid bacterium.  
585 *FEMS Microbiology Letters*, 160(2):247–252, 1998.
- 586 A. J. Ramsey and J. R. Mandel. *When One Genome Is Not Enough: Organellar Hetero-*  
587 *plasmly in Plants*, pages 619–658. John Wiley & Sons, Ltd, 2019.
- 588 J. Rodríguez-Beltrán, J. DelaFuente, R. León-Sampedro, R. C. MacLean, and A. San Mil-  
589 lan. Beyond horizontal gene transfer: the role of plasmids in bacterial evolution. *Nature*  
590 *Reviews Microbiology*, 19:347–359, 2021. doi: [doi.org/10.1038/s41579-020-00497-1](https://doi.org/10.1038/s41579-020-00497-1).
- 591 J. Rodriguez-Beltran, J. C. R. Hernandez-Beltran, J. DelaFuente, J. A. Escudero, A.  
592 Fuentes-Hernandez, R. C. MacLean, R. Peña-Miller, and A. S. Millan. Multicopy plas-  
593 mids allow bacteria to escape from fitness trade-offs during evolutionary innovation.  
594 *Nature Ecology & Evolution*, 2(5):873–881, 2018.
- 595 R. Rownd. Replication of a bacterial episome under relaxed control. *Journal of Molecular*  
596 *Biology*, 44(3):387–402, 1969.
- 597 M. Santer and H. Uecker. Evolutionary rescue and drug resistance on multicopy plasmids.  
598 *Genetics*, 215(3):847–868, 2020.
- 599 D. Schneider, E. Fuhrmann, I. Scholz, W. R. Hess, and P. L. Graumann. Fluorescence  
600 staining of live cyanobacterial cells suggest non-stringent chromosome segregation and  
601 absence of a connection between cytoplasmic and thylakoid membranes. *BMC Cell Bi-*  
602 *ology*, 8, 2007.
- 603 K. Skarstad, E. Boye, and H. Steen. Timing of initiation of chromosome replication in  
604 individual *Escherichia coli* cells. *The EMBO Journal*, 5(7):1711–1717, 1986.
- 605 J. Soppa. Non-equivalent genomes in polyploid prokaryotes. *Nature Microbiology*, 2021.  
606 doi: [doi.org/10.1038/s41564-021-01034-3](https://doi.org/10.1038/s41564-021-01034-3).

- 607 J. Soppa. Polyploidy and community structure. *Nature Microbiology*, 2(2):16261, 2017.
- 608 J. B. Stewart and P. F. Chinnery. The dynamics of mitochondrial DNA heteroplasmy:  
609 implications for human health and disease. *Nature Reviews Genetics*, 16(9):530–542,  
610 2015.
- 611 M. H. Suh, L. Pulakat, and N. Gavini. Isolation and characterization of *nif::kanamycin*  
612 and nitrogen fixation proficient *Azotobacter vinelandii* strain, and its implication on the  
613 status of multiple chromosomes in azotobacter. *Genetica*, 110:101–107, 2000.
- 614 L. Sun, H. K. Alexander, B. Bogos, D. J. Kiviet, M. Ackermann, and S. Bonhoeffer.  
615 Effective polyploidy causes phenotypic delay and influences bacterial evolvability. *PLOS*  
616 *Biology*, 16(2):e2004644, 2018.
- 617 D. M. Tobiason and H. S. Seifert. Genomic content of *Neisseria species*. *Journal of Bac-*  
618 *teriology*, 192(8):2160–2168, 2010.
- 619 X. Wang, H. B. Brandão, T. B. K. Le, M. T. Laub, and D. Z. Rudner. *Bacillus subtilis* SMC  
620 complexes juxtapose chromosome arms as they travel from origin to terminus. *Science*,  
621 355(6324):524–527, 2017.
- 622 S. Watanabe. Cyanobacterial multi-copy chromosomes and their replication. *Bioscience*,  
623 *Biotechnology, and Biochemistry*, 84(7):1309–1321, 2020.
- 624 S. Watanabe, R. Ohbayashi, Y. Shiwa, A. Noda, Y. Kanesaki, T. Chibazakura, and H.  
625 Yoshikawa. Light-dependent and asynchronous replication of cyanobacterial multi-copy  
626 chromosomes. *Molecular Microbiology*, 83(4):856—865, 2012.
- 627 H.-Y. Wu, K. Lau, and L. F. Liu. Interlocking of plasmid DNAs due to lac repressor-  
628 operator interaction. *Journal of Molecular Biology*, 228(4):1104–1114, 1992.

## 629 A Appendix

### 630 A.1 Mathematical formulation of the model and stochastic com- 631 puter simulations

632 We describe the dynamics of the system by a state vector  $\mathbf{N}(t) = (N_0(t), N_1(t), \dots, N_n(t))$ ,  
633 where  $N_i(t)$  denotes the number of cells with  $i$  mutant replicon copies ('cells of type  $i$ ').  
634 For all times  $t$ , the total number of cells  $N = \sum_{i=0}^n N_i$  is constant, whereas the relative  
635 abundances of the different types may change. The number of cells of any type  $i$  can be  
636 altered either by cell division or by cell death. Cell death occurs by removal of a randomly  
637 chosen cell from the population right after cell division so that the total population size  
638 remains constant.

639 The rate at which a cell of type  $i$  divides into daughter cells of type  $(j_1, j_2)$  (ordered pair)  
640 is given by  $N_i \lambda_i p_{i \rightarrow j_1 j_2}$ , where  $p_{i \rightarrow j_1 j_2}$  denotes the probability that cell division leads to  
641 daughter cells of type  $j_1$  (first daughter cell) and  $j_2$  (second daughter cell). The probability  
642 distribution  $p_{i \rightarrow j_1 j_2}$  depends on the mode of replication and the mode of segregation and  
643 will be derived below for the various replication and segregation modes shown in Figure 1.  
644 The probability that a cell of type  $l$  is replaced following division of an  $i$ -type cell is given  
645 by  $\nu_l = N_l/N$  if  $l \neq i$  and  $\nu_l = (N_l - 1)/N$  if  $l = i$ . Thus, cell division events that increment  
646 the number of cells of type  $j_1$  and  $j_2$  (new daughter cells) and decrement the number of  
647 cells of type  $i$  (dividing cell) and of type  $l$  (replaced cell) occur at rate  $N_i \lambda_i p_{i \rightarrow j_1 j_2} \nu_l$ . It  
648 should be noted that some or all of the cell types  $j_1, j_2, i, l$  may be identical. Cell division  
649 events that do not change the state vector  $\mathbf{N}$  can be omitted in the simulations and when  
650 deriving the deterministic dynamics.

651 We now derive the probability distributions  $p_{i \rightarrow j_1 j_2}$  for the different modes of replication and  
652 segregation. For *regular replication*, each replicon copy is duplicated, resulting in exactly

653  $k = 2i$  mutated copies just before cell division of a type- $i$  cell. For *random replication*,  $k$  is  
 654 a random number. The successive replication of copies before cell division corresponds to  
 655 a Pólya urn model (Eggenberger and Pólya, 1923; Mahmoud, 2008), and the probability  
 656 to have  $k$  mutated copies before cell division is given by

$$657 \quad p^{(\text{succ})}(k; i, n) := \binom{n}{k-i} \frac{B(k, 2n-k)}{B(i, n-i)} \quad (\text{A.1})$$

658 for  $i+n \geq k \geq i$  and zero otherwise, in case of heterozygous types  $0 < i < n$ .  $B$  denotes  
 659 the Beta-function, where, for positive integers,

$$660 \quad B(x, y) = \frac{(x-1)!(y-1)!}{(x+y-1)!}. \quad (\text{A.2})$$

661 For homozygous types  $i = 0$ ,  $i = n$ , we have  $p^{(\text{succ})}(k; i, n) := \delta_{k,2i}$ , where  $\delta_{k,2i}$  denotes  
 662 Kronecker's delta.

663 Mutant and wild-type replicon copies are distributed to the daughter cells according to the  
 664 chosen mode of segregation. In all of them, each daughter cell receives exactly  $n$  replicon  
 665 copies in total. In the case of *random segregation*, the probability that a cell containing  $k$   
 666 mutant copies just before division produces two daughter cells of types  $(j_1, j_2)$  is given by

$$667 \quad \frac{\binom{k}{j_1} \binom{2n-k}{n-j_1}}{\binom{2n}{n}} \delta_{k,j_1+j_2}, \quad (\text{A.3})$$

668 where  $\delta_{k,j_1+j_2}$  denotes Kronecker's delta. If we combine this term with  $k = 2i$  for *regular*  
 669 *replication* (reg) or with the probability distribution for *random replication* (ran), we obtain

$$670 \quad p_{i \rightarrow j_1 j_2}^{(\text{reg})} = \frac{\binom{2i}{j_1} \binom{2n-2i}{n-j_1}}{\binom{2n}{n}} \delta_{2i,j_1+j_2} \quad (\text{A.4})$$

$$671 \quad p_{i \rightarrow j_1 j_2}^{(\text{ran})} = \sum_{k=i}^{i+n} p^{(\text{succ})}(k; i, n) \frac{\binom{k}{j_1} \binom{2n-k}{n-j_1}}{\binom{2n}{n}} \delta_{k,j_1+j_2}. \quad (\text{A.5})$$

672

673 For the segregation modes, where sister replicons are clustered (ii) or separated (iii) to  
 674 different daughter cells we only consider *regular replication* since *random replication* does  
 675 not allow defining unique pairs of sister replicons. Similarly, we do not consider *random*  
 676 *replication* for the segregation mode (iv) *asymmetric inheritance of replicon copies* since  
 677 replicating one copy two times would violate our assumption of equal copy numbers in both  
 678 daughter cells: For *asymmetric inheritance of replicon copies*, the two replicon copies that  
 679 form the oldest link in genealogy are segregated to distinct daughter cells together with  
 680 all their younger sisters (see below). Therefore, it is needed that each copy is duplicated  
 681 (regular replication) once so that both daughter cells receive  $n$  replicon copies.

682 In the case of *clustered segregation of sister replicons* (clu) combined with *regular repli-*  
 683 *cation*, we need to consider the random distribution of  $i$  pairs of mutant replicon copies  
 684 instead of  $2i$  individual mutant replicon copies (cf. Equation A.4). The probability that  
 685 an  $i$ -type cell with  $i$  pairs of mutant copies before cell division produces two daughter cells  
 686 with  $(j_1/2, j_2/2)$  mutant couples respectively can be derived by replacing  $2i \rightarrow i$ ,  $2n \rightarrow n$ ,  
 687 and  $2j_m \rightarrow j_m$ ,  $m = 1, 2$  in Equation (A.4). We obtain

$$688 \quad p_{i \rightarrow j_1 j_2}^{(\text{cou})} = \begin{cases} \frac{\binom{i}{j_1/2} \binom{n-i}{n/2-j_1/2}}{\binom{n}{n/2}} \delta_{2i, j_1+j_2} & \text{for } j_1 \text{ even,} \\ 0 & \text{otherwise.} \end{cases} \quad (A.6)$$

689

690 For this mode, we need to restrict the replicon copy number to even numbers  $n$ .

691 For the mode of *separation of sister replicon copies* (sep), reproduction of  $i$ -type cells  
 692 produces only daughter cells of type  $j_1 = j_2 = i$ . Thus, we have

$$693 \quad p_{i \rightarrow j_1 j_2}^{(\text{par})} = \delta_{i, j_1} \delta_{i, j_2}. \quad (A.7)$$

694

695 For the mode of *asymmetric inheritance of replicon copies* (asy), a heterozygous cell of

696 type  $i$ , where  $0 < i < n/2$ , divides into one daughter cell with twice the number of mutated  
 697 copies than the parental cell and one daughter cell with only wild-type copies, i.e.,  $j_1 = 2i$   
 698 and  $j_2 = 0$ . (From this, it follows that there are no heterozygous cells with  $i > n/2$ .)  
 699 Homozygous cells divide into two homozygous daughter cells of the same type. Therefore,  
 700 the probability that an  $i$ -type cell produces daughter cells  $(j_1, j_2)$  is given by

$$701 \quad p_{i \rightarrow j_1 j_2}^{(\text{asy})} = \begin{cases} \delta_{2i, j_1} \delta_{0, j_2} & \text{if } 0 < i < n/2, \\ \delta_{n, j_1} \delta_{n, j_2} & \text{if } i = n, \\ \delta_{0, j_1} \delta_{0, j_2} & \text{if } i = 0. \end{cases} \quad (\text{A.8})$$

702

703 We perform stochastic computer simulations using the Gillespie algorithm (Gillespie, 1976),  
 704 which implements the models exactly. The simulation code is written in the Python pro-  
 705 gramming language (File S2).

## 706 A.2 Derivation of the deterministic dynamics

707 The derivation of the deterministic dynamics is identical to Santer and Uecker (2020). We  
 708 recapitulate it here such that the article is self-contained.

709 To obtain the deterministic dynamics, we look at all events that alter the number of cells  
 710  $N_j$  of a distinct type  $j$ . The following events can alter  $N_j$ : 1) Cell division of  $j$ -type cells,  
 711 which occurs at rate  $N_j \lambda_j$  and reduces  $N_j$  by 1. 2) When cells of any type  $i$  divide, they  
 712 may produce  $m = 1$  or  $m = 2$  daughter cells of type  $j$ , which increases  $N_j$  by  $m$ , with  
 713 probability

$$714 \quad p_{i \rightarrow j}^{(m)} := \begin{cases} \sum_{\substack{j=0 \\ j \neq j'}}^n p_{i \rightarrow j j'} + p_{i \rightarrow j' j} & \text{for } m = 1, \\ p_{i \rightarrow j j} & \text{for } m = 2. \end{cases} \quad (\text{A.9})$$

715 3) Replacement of a randomly chosen cell of type  $j$ , which reduces  $N_j$  by 1. All combinations of these three events with the corresponding rates are listed in Table 1. Putting all those

Table 1: Events that involve cells of type  $j$ . A parental cell of type  $i$  produces two daughter cells of type  $\{j, j'\}$  replacing the parental cell and one randomly chosen cell of type  $l$ . Rates of the events are obtained by the product of cell division rates and the probability that a  $j$ -type cell is replaced.  $j, \neq j$  denotes that one of the two daughter cells is of type  $j$  and the other is not of type  $j$  regardless of the order.

| Parental cell type $i$ | Daughter cell types | Cell type of replaced cell | Change in $N_j$ | Rate of reaction                                                                                                   |
|------------------------|---------------------|----------------------------|-----------------|--------------------------------------------------------------------------------------------------------------------|
| $j$                    | $j, j$              | $j$                        | 0               | –                                                                                                                  |
| $j$                    | $j, j$              | $\neq j$                   | +1              | $N_j \lambda_j p_{j \rightarrow j}^{(2)} \left(1 - \frac{N_j - 1}{N - 1}\right)$                                   |
| $j$                    | $j, \neq j$         | $j$                        | –1              | $N_j \lambda_j p_{j \rightarrow j}^{(1)} \frac{N_j - 1}{N - 1}$                                                    |
| $j$                    | $j, \neq j$         | $\neq j$                   | 0               | –                                                                                                                  |
| $j$                    | $\neq j, \neq j$    | $j$                        | –2              | $N_j \lambda_j (1 - p_{j \rightarrow j}^{(1)} - p_{j \rightarrow j}^{(2)}) \frac{N_j - 1}{N - 1}$                  |
| $j$                    | $\neq j, \neq j$    | $\neq j$                   | –1              | $N_j \lambda_j (1 - p_{j \rightarrow j}^{(1)} - p_{j \rightarrow j}^{(2)}) \left(1 - \frac{N_j - 1}{N - 1}\right)$ |
| $\neq j$               | $j, j$              | $j$                        | +1              | $N_i \lambda_i p_{i \rightarrow j}^{(2)} \frac{N_j}{N - 1}$                                                        |
| $\neq j$               | $j, j$              | $\neq j$                   | +2              | $N_i \lambda_i p_{i \rightarrow j}^{(2)} \left(1 - \frac{N_j}{N - 1}\right)$                                       |
| $\neq j$               | $j, \neq j$         | $j$                        | 0               | –                                                                                                                  |
| $\neq j$               | $j, \neq j$         | $\neq j$                   | +1              | $N_i \lambda_i p_{i \rightarrow j}^{(1)} \left(1 - \frac{N_j}{N - 1}\right)$                                       |
| $\neq j$               | $\neq j, \neq j$    | $j$                        | –1              | $N_i \lambda_i (1 - p_{i \rightarrow j}^{(1)} - p_{i \rightarrow j}^{(2)}) \frac{N_j}{N - 1}$                      |
| $\neq j$               | $\neq j, \neq j$    | $\neq j$                   | 0               | –                                                                                                                  |

716

717 terms together, we obtain

$$\begin{aligned}
 \dot{N}_j &= N_j \lambda_j p_{j \rightarrow j}^{(2)} \left(1 - \frac{N_j - 1}{N - 1}\right) - N_j \lambda_j p_{j \rightarrow j}^{(1)} \frac{N_j - 1}{N - 1} \\
 &\quad - 2N_j \lambda_j (1 - p_{j \rightarrow j}^{(1)} - p_{j \rightarrow j}^{(2)}) \frac{N_j - 1}{N - 1} - N_j \lambda_j (1 - p_{j \rightarrow j}^{(1)} - p_{j \rightarrow j}^{(2)}) \left(1 - \frac{N_j - 1}{N - 1}\right) \\
 &\quad + \sum_{\substack{i=0 \\ i \neq j}}^n N_i \lambda_i p_{i \rightarrow j}^{(2)} \frac{N_j}{N - 1} + 2N_i \lambda_i p_{i \rightarrow j}^{(2)} \left(1 - \frac{N_j}{N - 1}\right) \\
 &\quad + N_i \lambda_i p_{i \rightarrow j}^{(1)} \left(1 - \frac{N_j}{N - 1}\right) - N_i \lambda_i (1 - p_{i \rightarrow j}^{(1)} - p_{i \rightarrow j}^{(2)}) \frac{N_j}{N - 1} \\
 &\approx \sum_{i=0}^n N_i \lambda_i \left(2p_{i \rightarrow j}^{(2)} + p_{i \rightarrow j}^{(1)} - \frac{N_j}{N}\right) - N_j \lambda_j,
 \end{aligned} \tag{A.10}$$

718

719 where we have used  $N - 1 \approx N$  and  $N_j - 1 \approx N_j$  (Santer and Uecker, 2020). The  
720 deterministic dynamics of the system is obtained by simultaneously integrating all  $n + 1$   
721 equations for the cell type frequencies  $x_j = \frac{N_j}{N}$ ,  $j = 0, \dots, n$ :

$$722 \quad \dot{x}_j = \sum_{i=0}^n \left\{ x_i \lambda_i \underbrace{(2p_{i \rightarrow j}^{(2)} + p_{i \rightarrow j}^{(1)})}_{=: m_{i \rightarrow j}} - x_j \lambda_j \right\}, \quad (\text{A.11})$$

723 where we introduced  $m_{i \rightarrow j}$  as the expected number of  $j$ -type cells produced at division of  
724 an  $i$ -type cell used below.

### 725 **A.3 Mathematical derivation for the conditions under which a** 726 **heterozygosity window exists under random segregation**

727 We here derive the criteria (1) and (2) for observing a heterozygosity window given that the  
728 initial frequency of mutant cells  $f$  is small. By definition, a heterozygosity window occurs  
729 if there are still heterozygous cells present at the time of fixation  $t_{\text{phen}}$  at the phenotype  
730 level. This may simply happen if the heterozygous cells that were present at time  $t = 0$   
731 have not fully decayed yet. This leads to a very small window though. A more relevant  
732 heterozygosity window occurs, if the heterozygotes initially increase in frequency during  
733 the fixation process (Figure 2). This observation builds the basis of our approximation.



734 For the frequency of heterozygous cells, i.e.,  $0 < j < n$ , we derive from Eq. (A.11)

$$\begin{aligned}
 735 \quad \dot{x}_j &= \sum_{i=0}^n x_i \lambda_i (m_{i \rightarrow j} - x_j) - x_j \lambda_j \\
 736 \quad &= -\lambda_0 x_0 x_j - \lambda_n x_n x_j + \sum_{i=1}^{n-1} x_i \lambda_i (m_{i \rightarrow j} - x_j) - x_j \lambda_j \\
 737 \quad &\approx -\lambda_0 x_j - \lambda_j x_j + \sum_{i=1}^{n-1} \lambda_i m_{i \rightarrow j} x_i \\
 738 \quad &= -x_j - (1+s)x_j + \sum_{i=1}^{n-1} (1+s)m_{i \rightarrow j} x_i \\
 739 \quad &= \sum_{i=1}^{n-1} ((1+s)(m_{i \rightarrow j} - \delta_{ji}) - \delta_{ji}) x_i, \tag{A.12} \\
 740
 \end{aligned}$$

741 where  $\delta_{ji}$  denotes Kronecker's Delta. Here, we have neglected quadratic terms of mutant  
 742 cell frequencies  $x_i x_j$ , where  $i > 0$  and  $j > 0$ , as mutant cell frequencies are low at early  
 743 time points in the fixation process.

744 We choose the initial mutant frequency  $f$  sufficiently low so that the relative frequencies  
 745 of heterozygote types equilibrate quickly compared to the time it takes for mutant cells to  
 746 reach high frequencies in the population. The frequencies of heterozygote types then take  
 747 approximately the form of the right eigenvector corresponding to the leading eigenvalue of  
 748 the matrix  $(m_{i \rightarrow j} - \delta_{ji})_{ji \in \{1, \dots, n-1\}}$  (see Eq. (A.12)). In the following, we denote by  $x_i$  the  
 749 frequencies of cells of type  $i$  at such an early time  $t$  assuming that the relative heterozygous  
 750 frequencies are in equilibrium.

751 If replication is regular, we have  $m_{i \rightarrow j} = 2 \binom{2i}{j} / \left( \binom{2n-2i}{n-j} \binom{2n}{n} \right)$  (see Eq. (A.4) and (A.9)).  
 752 The dominant eigenvalue of the matrix  $(m_{i \rightarrow j} - \delta_{ij})_{ji \in \{1, \dots, n-1\}}$  for regular replication can  
 753 be calculated explicitly as

$$\xi = \frac{2n-3}{2n-1} \tag{A.13}$$

754 (Novick and Hoppensteadt, 1978,  $\lambda^*$  in their Eq. (2) is the dominant eigenvalue of the  
 755 matrix  $(m_{i \rightarrow j}/2)_{i,j \in \{1, \dots, n-1\}}$ . Since  $(x_1, \dots, x_{n-1})$  is the eigenvector corresponding to  $\xi$ , we  
 756 obtain for the time derivative of the frequency of all heterozygous cells  $x_{\text{het}} := \sum_{j=1}^{n-1} x_j$ :

$$\begin{aligned}
 757 \quad \dot{x}_{\text{het}} &= \sum_{j=1}^{n-1} \dot{x}_j \\
 758 \quad &\approx \sum_{j=1}^{n-1} \sum_{i=1}^{n-1} ((1+s)(m_{i \rightarrow j} - \delta_{ij}) - \delta_{ij}) x_i \\
 759 \quad &= \sum_{j=1}^{n-1} ((1+s)\xi - 1) x_j \\
 760 \quad &= ((1+s)\xi - 1) x_{\text{het}} \tag{A.14a}
 \end{aligned}$$

$$\begin{aligned}
 761 \quad &= ((1+s) \frac{2n-3}{2n-1} - 1) x_{\text{het}}. \tag{A.14b} \\
 762
 \end{aligned}$$

763 Thus, heterozygous cells increase in frequency early in the fixation process if

$$\begin{aligned}
 764 \quad &(1+s) \frac{2n-3}{2n-1} - 1 > 0 \\
 765 \quad &\Leftrightarrow s > \frac{1}{n-3/2} \stackrel{n \gg 1}{\approx} \frac{1}{n}. \\
 766
 \end{aligned}$$

767 If there is no selection, i.e.,  $s = 0$ , we have

$$\begin{aligned}
 768 \quad \dot{x}_j &= \sum_{i=0}^n x_i (m_{i \rightarrow j} - x_j) - x_j \lambda_j \\
 769 \quad &= -x_j + \sum_{i=1}^{n-1} x_i m_{i \rightarrow j} - x_j \tag{A.15} \\
 770 \quad &= \sum_{i=1}^{n-1} ((m_{i \rightarrow j} - \delta_{ji}) - \delta_{ji}) x_i. \\
 771
 \end{aligned}$$

772 (The final expression is the same as in Eq. (A.12), but the derivation does not require any

773 approximation if  $s = 0$ .) Analogous to Eq. (A.14b), we then obtain

$$\begin{aligned} 774 \quad \dot{x}_{\text{het}} &= -\frac{1}{n-1/2}x_{\text{het}} \\ 775 \quad &=: -\eta^{(\text{reg})}x_{\text{het}}, \end{aligned} \tag{A.16}$$

777 where  $\eta^{(\text{reg})}$  can be interpreted as the heterozygote loss rate.

778 For random replication, the dominant eigenvalue of the matrix  $(m_{i \rightarrow j} - \delta_{ij})_{j \in \{1, \dots, n-1\}}$  can  
779 be calculated as

$$\begin{aligned} 780 \quad \xi &= \frac{(2n-3)n-1}{2n^2+n-1} \\ 781 \end{aligned} \tag{A.17}$$

782 (Novick and Hoppensteadt, 1978). For this mode, we obtain in an analogous manner the  
783 criterion for the heterozygosity window

$$\begin{aligned} 784 \quad s &> \frac{4n}{2n^2-3n-1} \stackrel{n \gg 1}{\approx} \frac{2}{n}. \\ 785 \end{aligned} \tag{A.18}$$

786 and the heterozygote loss rate

$$\begin{aligned} 787 \quad \eta^{(\text{ran})} &= -\frac{2n}{n^2 + \frac{n}{2} - 1} \stackrel{n \gg 1}{\approx} \frac{2}{n}. \\ 788 \end{aligned} \tag{A.19}$$

789 In a simpler model used by Rodriguez-Beltran et al. (2018), where heterozygous cells always  
790 contain an equal proportion of mutant and wild-type copies, the dynamics of heterozygous  
791 cells without selection and at low heterozygote frequencies can be described analogous to  
792 Eq. (A.12) by

$$\begin{aligned} 793 \quad \dot{x}_{\text{het}} &= (p_{\text{het} \rightarrow \text{het}} - 2)x_{\text{het}} \\ 794 \end{aligned}$$

795 where  $p_{\text{het} \rightarrow \text{het}} = 2(1 - 2^{1-n})$  denotes the expected number of heterozygous cells created at  
 796 cell division of a heterozygote. Note that  $2^{1-n}$  is the probability that two homozygous cells  
 797 are formed at cell division of a heterozygous cell (Rodriguez-Beltran et al., 2018). This  
 798 leads to

$$800 \quad \dot{x}_{\text{het}} = -2^{1-n}x_{\text{het}}, \quad (\text{A.20})$$

801 where  $2^{1-n}$  is the heterozygote loss rate under this simpler model. Here, the heterozygote  
 802 loss rate decreases exponentially with the replicon copy number  $n$ , whereas in our model,  
 803 which considers different compositions of mutant and wild-type copies, the loss rate scales  
 804 with  $1/n$ .

#### 805 **A.4 Cell-type frequencies at transformation-selection balance**

806 In this section, we derive the population composition at transformation-selection balance.  
 807 We assume that at every transformation event, one replicon copy in the recipient cell is  
 808 replaced. Mutant copies are integrated at per cell rate  $\tau$ . For a cell with  $j$  mutant replicon  
 809 copies, the probability that a wild-type copy is replaced is given by  $\frac{n-j}{n}$ . This changes its  
 810 cell type  $j \rightarrow j+1$ . Mutant cells of type  $j > 0$  have a reduced reproduction rate  $1 - \sigma < 1$ ,  
 811 i.e., they are negatively selected. The transformation-selection balance reflects the state at  
 812 which the input of the mutant variant through transformation and the selection outweigh  
 813 each other. The time derivatives of the cell-type abundances  $\dot{N}_j$  are given by

$$814 \quad \dot{N}_j \approx \begin{cases} \sum_{i=0}^n N_i \lambda_i (m_{i \rightarrow 0} - x_0) - N_0 \lambda_0 - N_0 \tau & \text{for } i = 0, \\ \sum_{i=0}^n N_i \lambda_i (m_{i \rightarrow j} - x_j) - N_j \lambda_j + \tau (N_{j-1} \frac{n-(j-1)}{n} - N_j \frac{n-j}{n}) & \text{for } 0 < j \leq n. \end{cases}$$

816 The time derivatives of the relative frequencies  $x_i = N_i/N$  are thus given by

$$\dot{x}_j = \sum_{i=0}^n x_i \lambda_i (m_{i \rightarrow j} - x_j) - x_j \lambda_j + \tau \eta_j \quad (\text{A.21})$$

819 with  $\eta_j = (x_{j-1} - x_j)(1 - \frac{j}{n}) + \frac{x_{j-1}}{n}$  for  $i > 0$  and  $\eta_0 = -x_0$ . Finding the equilibrium  
820  $(x_0, \dots, x_n)$  where  $\dot{x}_j = 0$  for all  $j$  was performed numerically by simultaneously integrating  
821  $x_j$  for all  $j$  until  $\dot{x}_j/x_j < 10^{-8}$ .
